1 **RESEARCH ARTICLE**

2 **Sweet revenge: AtSWEET12 in plant defense against bacterial pathogens by**  
3 **apoplastic sucrose limitation**

4 **Urooj Fatima and Muthappa Senthil-Kumar\***

5 National Institute of Plant Genome Research, Aruna Asaf Ali Marg, New Delhi, India

6 \* Corresponding author:

7 Muthappa Senthil-Kumar

8 National Institute of Plant Genome Research

9 Aruna Asaf Ali Marg

10 P.O. Box No. 10531

11 New Delhi 110067, India

12 Email: [skmuthappa@nipgr.ac.in](mailto:skmuthappa@nipgr.ac.in)

13

14 **Short title:** AtSWEET12 contributes to plant defense

15

16 **One sentence summary:**

17 The transporter AtSWEET12 restricts bacterial pathogen multiplication by regulating  
18 sucrose availability to pathogens in the apoplast.

19

20 The author responsible for distribution of materials integral to the findings presented  
21 in this article in accordance with the policy described in the Instructions for Authors  
22 is: Muthappa Senthil-Kumar ([skmuthappa@nipgr.ac.in](mailto:skmuthappa@nipgr.ac.in)).

23

24

25

26

27

## 28 **ABSTRACT**

29 Depriving bacterial pathogens of sugars is a potential plant defense strategy. The  
30 relevance of SUGARS WILL EVENTUALLY BE EXPORTED TRANSPORTERS  
31 (SWEETs) in plant susceptibility to pathogens has been established, but their role in  
32 plant defense remains unknown. We identified *Arabidopsis thaliana* SWEETs  
33 (AtSWEETs) involved in defense against nonhost and host *Pseudomonas syringae*  
34 pathogens through reverse genetic screening of *atsweet1–17* mutants. Double/triple  
35 mutant, complementation, and overexpression line analysis, and apoplastic sucrose  
36 estimation studies revealed that AtSWEET12 suppresses pathogen multiplication by  
37 limiting sucrose availability in the apoplast. Localization studies suggested that plant  
38 defense occurred via increased plasma membrane targeting of AtSWEET12 with  
39 concomitant AtSWEET11 protein reduction. Moreover, the heterooligomerization of  
40 AtSWEET11 and AtSWEET12 was involved in regulating sucrose transport. Our  
41 results highlight a PAMP-mediated defense strategy against foliar bacterial  
42 pathogens whereby plants control AtSWEET11-mediated sucrose efflux in the  
43 apoplast through AtSWEET12. We uncover a fascinating new mechanism of  
44 pathogen starvation as a broad-spectrum disease resistance mechanism in parallel  
45 with existing immune pathways.

46

## 47 **INTRODUCTION**

48 Most plant nutrients are sequestered inside the cell and are not easily accessible to  
49 bacterial pathogens<sup>1,2</sup>. Meanwhile, the apoplast is a nutrient niche in plant cells,  
50 where some nutrients are readily available. Many bacterial pathogens colonize the  
51 apoplast and utilize the sugars available therein. Studies in *Arabidopsis thaliana* and  
52 *Nicotiana benthamiana* have indicated that bacterial infection alters membrane  
53 permeability characteristics, leading to the release of sugars from the cytosol into the  
54 apoplast<sup>3</sup>. Plant defense mechanisms limiting sugar availability to bacterial  
55 pathogens have been ascribed to the regulation of sugar levels in the apoplast<sup>3-8</sup>.  
56 Thus far, studies related to plant defense mechanisms have mainly focused on  
57 antimicrobial compounds, reactive oxygen species production, the hypersensitive

58 response, callose deposition, etc.<sup>9-11</sup>. However, the concept of sugar limitation to  
59 pathogens as a plant defense strategy has not been examined in detail.

60 Sugars are transported symplastically via plasmodesmata or apoplastically via sugar  
61 transporters located on the plasma membrane<sup>6,12</sup>. It is reasonable that plants might  
62 regulate sugar levels in the apoplast by controlling sugar transporters. A recent study  
63 in *Arabidopsis* suggested a plant defense strategy involving the control of sugar  
64 uptake in the apoplast by regulating sugar transporter protein 13 (STP13), which  
65 limits sugar availability to bacterial pathogens<sup>13</sup>. Further, a new class of sugar efflux  
66 transporters—SUGARS WILL EVENTUALLY BE EXPORTED TRANSPORTERS  
67 (SWEETs)—has been identified in several plant species<sup>12,14,15</sup>. In *Arabidopsis*, they  
68 comprise 17 members, which are divided into four clades<sup>12,14-18</sup>. The members of  
69 clades I, II, and IV are mainly hexose transporters, involved in the efflux of glucose,  
70 galactose, and fructose, respectively<sup>7,15</sup>. Clade III SWEET members preferentially  
71 transport sucrose<sup>12</sup>. AtSWEET11 and AtSWEET12 belong to this clade and are  
72 involved in sucrose efflux from the phloem parenchyma into the phloem apoplast, a  
73 critical step for subsequent phloem loading<sup>6</sup>.

74 Successful pathogens manipulate host plant sugar transporter machinery to redirect  
75 sugar efflux into the apoplast and establish their virulence<sup>12,19</sup>. Some SWEETs have  
76 been shown to be hijacked by bacterial pathogens for the release of sugar into the  
77 apoplast. For example, in rice, OsSWEET11 and OsSWEET14 are targeted by  
78 *Xanthomonas oryzae* pv. *oryzae* for releasing sugar into the apoplast<sup>12,20,21</sup>.  
79 Similarly, in *Arabidopsis*, the expression of different *AtSWEET* genes, including  
80 *AtSWEET11*, *AtSWEET12*, and *AtSWEET15*, is induced upon infection with fungi  
81 and hemibiotrophic bacterial pathogens<sup>12</sup>.

82

83 Contrarily, we speculate that as a part of the defense response, plants modulate the  
84 expression of *AtSWEET* genes to limit sugar release into the apoplast and thereby  
85 restrict sugar availability to bacterial pathogens, a likely explanation for “nonhost  
86 resistance.” Nonhost resistance is a durable type of plant disease resistance shown  
87 by an entire plant species to all isolates of a particular pathogen<sup>22-24</sup>. Hence,  
88 restricting sugar availability to nonhost pathogens is hypothesized to be an important  
89 plant defense strategy as a part of nonhost resistance<sup>3,24</sup>. In this study, we focused  
90 on 17 members of the *AtSWEET* family of sugar transporters to understand the

91 broad defense mechanism that might act against nonhost pathogens, namely,  
92 *Pseudomonas syringae* pv. *phaseolicola* and *P. syringae* pv. *tabaci*, and the host  
93 pathogen *P. syringae* pv. *tomato* DC3000

94

95

96 **RESULTS**

97

98 **Identification of the AtSWEET class of transporters involved in**  
99 **plant defense**

100

101 The role of AtSWEETs belonging to four different clades has been elucidated in plant  
102 development and pathogenesis (Supplementary Table 1, Supplementary Fig. 1). To  
103 identify the AtSWEETs potentially involved in plant defense, we performed the  
104 reverse genetic screening of all 17 Arabidopsis *atsweet* mutants and tested their  
105 response to two nonhost pathogens, namely, *P. syringae* pv. *phaseolicola* (*Psp*) and  
106 *P. syringae* pv. *tabaci* (*Pta*). The bacterial multiplication assay indicated that  
107 compared to the corresponding wild-type plants, *atsweet12* and *atsweet15* mutants  
108 supported more *Psp* and *Pta* bacterial multiplication, while *atsweet17* mutants  
109 supported more *Psp* bacterial multiplication only (Fig. 1a, Supplementary Fig. 2). The  
110 *atsweet12* and *atsweet15* mutant plants demonstrated compromised nonhost  
111 resistance toward both the nonhost pathogens. However, the bacterial multiplication  
112 numbers for *Psp* and *Pta* in *atsweet11* mutant plants were significantly lower than  
113 those in wild-type plants (Fig. 1a, Supplementary Fig. 2).

114 We further examined whether AtSWEETs are involved in basal defense against a  
115 host pathogen, *P. syringae* pv. *tomato* DC3000 (*Pst* DC3000). The increased  
116 bacterial number compared to wild-type plants in the bacterial multiplication assay  
117 showed that *atsweet5*, *atsweet7*, *atsweet12*, and *atsweet15* mutant plants were  
118 hypersusceptible (Fig. 1b). Correspondingly, these mutant plants showed a high  
119 disease index and a phenotype of severe chlorosis followed by necrosis, unlike wild-  
120 type plants (Supplementary Figs. 3, 4). However, although *atsweet17* mutant plants  
121 showed a high bacterial number, no significant difference was observed in disease  
122 index or phenotype compared to wild-type plants (Fig. 1b, Supplementary Figs. 3, 4).  
123 Further, *atsweet11* mutant plants showed a slight resistance response, i.e., lower  
124 host bacterial multiplication, lower disease index, and less severe chlorosis than  
125 those of wild-type plants (Fig. 1b, Supplementary Figs. 3, 4). Meanwhile, a  
126 susceptible response was seen in *atsweet12* and *atsweet15* mutant plants against  
127 the host pathogen. The results obtained from both nonhost and host pathogen  
128 infection data together indicate that AtSWEET11, AtSWEET12, and AtSWEET15  
129 could be potential candidates involved in plant defense.

Fig. 1

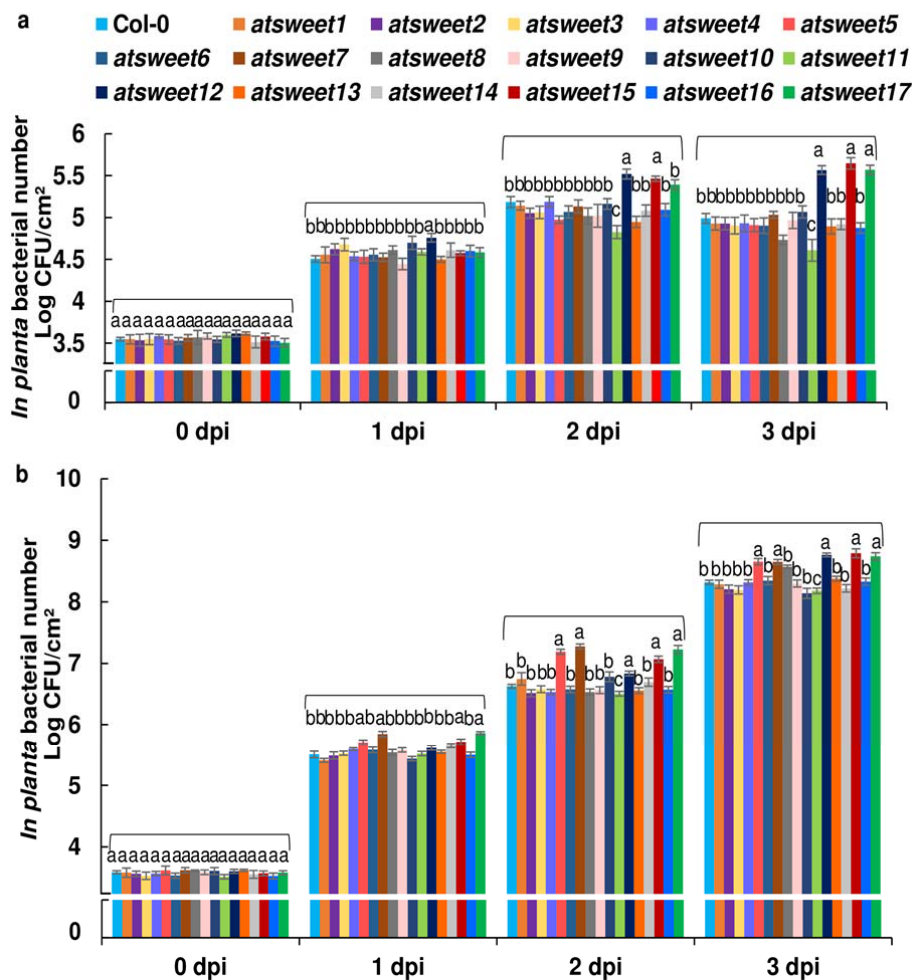

**Fig. 1 Mutant screening for the identification of AtSWEET transporters involved in plant defense.**

**a** and **b** The leaves of 32-day-old Arabidopsis wild-type (Col-0) and *atsweet1* to *atsweet17* mutant plants were inoculated with **(a)** the nonhost pathogen *Pseudomonas syringae* pv. *phaseolicola* (*Psp*) at  $1 \times 10^6$  CFU/mL and **(b)** the host pathogen *P. syringae* pv. *tomato* DC3000 (*Pst* DC3000) at  $5 \times 10^5$  CFU/mL. Bacterial multiplication assays were performed, and the bacterial populations were monitored by plating serial dilutions of leaf extracts at 0, 1, 2, and 3 days post inoculation (dpi). *In planta* bacterial number was expressed as  $\log_{10}$  values. Significant differences ( $P < 0.05$ ) after applying one-way ANOVA and Tukey's correction are indicated by different letters. Data were obtained from the mean of six biological replicates and two technical replicates. Error bars show the standard error of the mean (SEM) (see Supplementary Dataset S1 for raw data and statistics). The experiment was repeated twice, and consistent results were observed.

131 *AtSWEET12*, and *AtSWEET15*, the transcript levels of these genes were analyzed  
132 upon nonhost and host pathogen infection by RT-qPCR at 16 and 24 hours post  
133 inoculation (hpi). *AtSWEET11* transcripts were induced at 16 h and 24 h after host  
134 pathogen *Pst* DC3000 infection, but no alteration in the transcript levels was  
135 observed after infection with the nonhost pathogens compared to the mock control  
136 (Supplementary Fig. 5a). Thus, the expression data along with reverse genetic  
137 screening of *atsweet11* mutants point to the involvement of *AtSWEET11* in  
138 facilitating host pathogen infection. Moreover, the transcript levels of *AtSWEET12*  
139 and *AtSWEET15* were highly induced at 16 h after nonhost and host pathogen  
140 infection compared to the mock control. At 24 hpi, the transcript levels of  
141 *AtSWEET12* and *AtSWEET15* were still upregulated after host pathogen infection  
142 compared to the mock control. However, in case of inoculation with the nonhost  
143 pathogen at 24 h, the transcript expression of *AtSWEET12* was downregulated, but  
144 no significant difference was observed in the transcript expression of *AtSWEET15*  
145 compared to the mock control (Supplementary Fig. 5a). Thus, *AtSWEET12* and  
146 *AtSWEET15* participate in plant defense against both nonhost and host pathogens.  
147 To investigate whether the alteration in the expression of *AtSWEET11*, *AtSWEET12*,  
148 and *AtSWEET15* is type III secretion system (T3SS)-dependent, we used T3SS-  
149 deficient *hrcC* insertion mutants (*hrcC*<sup>-</sup>) of *Pst* DC3000 and *Pta* to inoculate the  
150 leaves of wild-type plants. The transcript levels of *AtSWEET11*, *AtSWEET12*, and  
151 *AtSWEET15* were found to be upregulated at 16 h after inoculation with *Pst* DC3000  
152 *hrcC*<sup>-</sup> T3SS secretion mutants compared to the mock control (Supplementary Fig.  
153 5a). Similarly, after inoculation with *Pta hrcC*<sup>-</sup>, the transcript levels of *AtSWEET12*  
154 and *AtSWEET15* were upregulated compared to the mock control. Hence, the  
155 induction of the transcript expression of these genes did not depend on the effectors  
156 of T3SS. To then determine whether the transcript levels of *AtSWEET11*,  
157 *AtSWEET12*, and *AtSWEET15* are modulated by the plant during pathogen-  
158 associated molecular pattern (PAMP)-triggered immunity (PTI), we examined the  
159 expression of these genes in leaves inoculated individually with the PAMP elicitor  
160 FLG22 and crude PAMPs obtained from *Pst* DC3000, *Psp*, and *Pta*. Interestingly, we  
161 observed the downregulation of *AtSWEET11* and strong induction of *AtSWEET12*  
162 and *AtSWEET15* 3 hpi after treatment with FLG22 and crude PAMPs of *Pst* DC3000,  
163 *Psp*, and *Pta* (Supplementary Fig. 5b, c). It appears that after PAMP perception, the  
164 transcript expression of *AtSWEET11* is reduced, while that of *AtSWEET12* and



165 *AtSWEET15* is induced by the plant. Thus, *AtSWEET12* and *AtSWEET15* are crucial  
166 in suppressing pathogen multiplication, whereas *AtSWEET11* facilitates pathogen  
167 multiplication.

168 Furthermore, the expression of *AtSWEET12* and *AtSWEET15* was found to be  
169 downregulated in *atsweet11*, and that of *AtSWEET11* and *AtSWEET15* was found to  
170 be downregulated in *atsweet12* mutant plants compared to the wild type  
171 (Supplementary Fig. 6a, b). In comparison to the mocks, nonhost pathogen infection  
172 induced *AtSWEET12* and *AtSWEET15* expression in the *atsweet11* mutant and  
173 *AtSWEET11* and *AtSWEET15* expression in the *atsweet12* mutant (Supplementary  
174 Fig. 6c, d). Thus, in the absence of *AtSWEET12*, which is involved in plant defense,  
175 the expression of *AtSWEET11* is high, which might support increased pathogen  
176 multiplication.

177

### 178 ***AtSWEET12* contributes to plant defense by suppressing pathogen** 179 **multiplication**

180 To clarify the role of *AtSWEET11*, *AtSWEET12*, and *AtSWEET15* in plant defense,  
181 we examined the response of the double mutants *atsweet11;12*, *atsweet11;15*, and  
182 *atsweet12;15* and the triple mutant *atsweet11;12;15* toward the nonhost pathogens  
183 *Psp* and *Pta* and the host pathogen *Pst* DC3000. The bacterial multiplication assay  
184 indicated that compared to the wild type, both the nonhost pathogens multiplied  
185 more in the *atsweet12;15* double mutant, relatively less in the *atsweet11;12;15* triple  
186 mutant, and very little in the *atsweet11;12* double mutant; no significant difference in  
187 bacterial number was observed in the *atsweet11;15* double mutant (Fig. 2a,  
188 Supplementary Fig. 7a). The nonhost pathogen *Psp*-infected *atsweet12;15* double  
189 mutant plants produced chlorotic disease symptoms at 3 days post inoculation (dpi)  
190 (Fig. 2c). Furthermore, the bacterial number of the host pathogen *Pst* DC3000 was  
191 also found to be highly increased in *atsweet12;15*, moderately decreased in  
192 *atsweet11;12;15*, and highly decreased in *atsweet11;12*; however, there was no  
193 significant difference in *atsweet11;15* compared to the wild type (Fig. 2b). *Pst*  
194 DC3000-infected *atsweet12;15* mutant plants showed a hypersusceptible response,  
195 indicated by enhanced chlorotic and necrotic disease symptoms and high disease  
196 index at 3 dpi compared to wild-type plants (Fig. 2c, d). In contrast, *Pst* DC3000-  
197 infected *atsweet11;12* mutant plants showed milder chlorotic symptoms and lower  
198 disease index than those in the wild-type plants (Fig. 2c, d). Interestingly, the



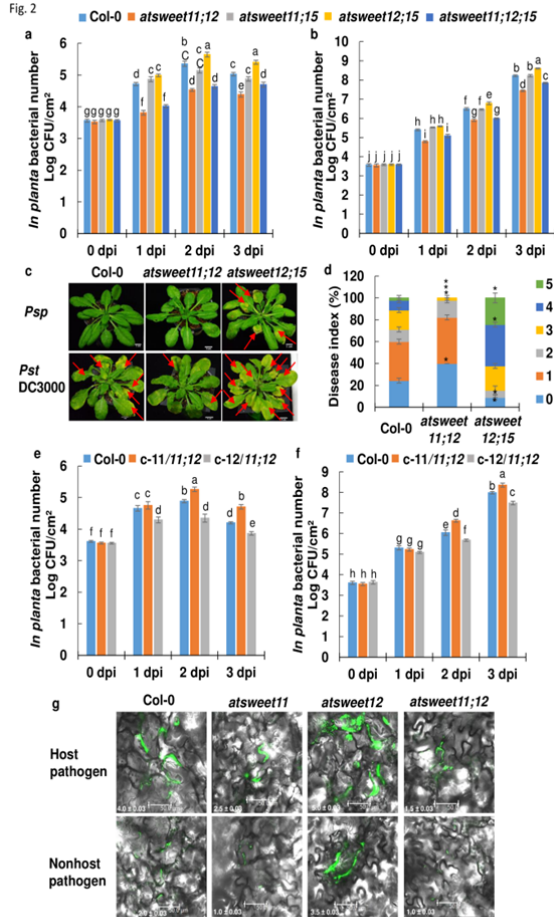

**Fig. 2** The sugar transporter AISWEET12 is involved in plant defense.

**a** and **b** The leaves of 32-day-old Arabidopsis wild-type (Col-0); *atsweet11;12*, *atsweet11;15*, and *atsweet12;15* double mutants; and *atsweet11;12;15* triple mutants were inoculated with **(a)** the nonhost pathogen *Psp* at  $1 \times 10^6$  CFU/mL and **(b)** the host pathogen *Pst* DC3000 at  $5 \times 10^5$  CFU/mL. Bacterial populations were monitored by plating serial dilutions of leaf extracts at 0, 1, 2, and 3 days post inoculation (dpi).

**c** Phenotypes of plants inoculated with the *Psp* and *Pst* DC3000. Water-inoculated plants (mock treatment) were used for comparison with pathogen-inoculated plants. Photographs were taken at 3 dpi. **d** Disease scoring was done for host pathogen-infected plants at 3 dpi. Scores were given on the basis of symptom development as follows, score 0: no symptoms, score 1: leaf margins showing chlorosis, score 2: midrib region of leaf showing chlorosis, score 3: two-thirds of leaf area showing chlorosis, score 4: full leaf showing chlorosis, score 5: leaf showing necrosis. Asterisks indicate a significant difference from the wild-type (Student's *t*-test; \* $P < 0.01$ ). Data were obtained from the mean of three biological replicates, and error bars show the SEM.

**e** and **f** Thirty-two-day-old Arabidopsis wild-type (Col-0) and complementation lines *c-11/11;12* and *c-12/11;12* transformed with p-AISWEET11:AISWEET11 and p-AISWEET12:AISWEET12, respectively, in the *atsweet11;12* double mutant background were syringe inoculated with **(e)** *Psp* at  $1 \times 10^6$  CFU/mL and **(f)** *Pst* DC3000 at  $5 \times 10^5$  CFU/mL. Bacterial populations were monitored by plating serial dilutions of the leaf extract at 0, 1, 2, and 3 dpi. For **a**, **b**, **e** and **f** in planta bacterial number was expressed as log<sub>10</sub> values.

**g** The in planta bacterial populations of green fluorescent protein (GFP)-labeled host pathogen *Pst* DC3000 and nonhost pathogen *P. syringae* pv. *tabaci* (*Pta*) were determined in the wild-type (Col-0), *atsweet11*, *atsweet12*, and *atsweet11;12* mutant plants. The leaves of 32-day-old Arabidopsis wild-type, *atsweet11*, *atsweet12*, and *atsweet11;12* mutant plants were inoculated with the *Pst* DC3000 expressing *GFPuv* at  $5 \times 10^5$  CFU/mL and *Pta* expressing *GFPuv* at  $3 \times 10^5$  CFU/mL. The population of fluorescent bacteria was monitored at 2 dpi by observing the leaf using a Leica TCS SP8 confocal microscope (excitation at 488 nm and emission between 500 and 600 nm). The images were taken using a 63X objective and merged together by Leica microsystems LAS AF confocal software. The GFP fluorescence signals were quantified by ImageJ software (<http://imagej.nih.gov/ij/>). The intensity values were calculated and presented at the bottom of the image. The intensity was depicted as log<sub>10</sub> values. For **a**, **b**, **e**, and **f**, significant differences ( $P < 0.05$ ) after applying two-way ANOVA and Tukey's correction are indicated by different letters. Data were obtained from the mean of six biological replicates and two technical replicates. Error bars show the SEM. The experiment was repeated thrice, and consistent results were observed.

200 *atsweet11* mutant and wild-type plants. Thus, mutation in both *AtSWEET11* and  
201 *AtSWEET12* enhanced the reduction in bacterial multiplication. Contrary to this,  
202 mutation in both *AtSWEET12* and *AtSWEET15* boosted bacterial multiplication but  
203 without additive effects on disease susceptibility. Simultaneous mutation in  
204 *AtSWEET11* and *AtSWEET15*, however, did not show any significant difference in  
205 bacterial multiplication compared to wild-type plants. These results suggest that  
206 *AtSWEET11* is epistatic over *AtSWEET12* but not *AtSWEET15*, and *AtSWEET11*  
207 and *AtSWEET12* play a major part during pathogen infection.

208

209 The absence of *AtSWEET11* and *AtSWEET12* together led to a resistance response  
210 toward the host pathogen. Therefore, we assessed the response of the  
211 complementation lines transformed with either *p-AtSWEET11:AtSWEET11* or  
212 *pAtSWEET12:AtSWEET12* in *atsweet11;12* double mutant plants toward the  
213 nonhost pathogens *Psp* and *Pta* and the host pathogen *Pst* DC3000. The *in planta*  
214 bacterial number in the complementation line of *p-AtSWEET11:AtSWEET11* in the  
215 *atsweet11;12* double mutant background showed increased *Psp*, *Pta*, and *Pst*  
216 DC3000 bacterial multiplication than that in the wild-type plants (Fig. 2e, f,  
217 Supplementary Fig. 7b). The complementation line of *pAtSWEET12:AtSWEET12* in  
218 the *atsweet11;12* double mutant showed less *Psp*, *Pta*, and *Pst* DC3000 bacterial  
219 multiplication than that of the wild type (Fig. 2e, f, Supplementary Fig. 7b). It is  
220 evident that the susceptible response of the complementation lines of *p-*  
221 *AtSWEET11:AtSWEET11* in the *atsweet11;12* double mutant was similar to that of  
222 *atsweet12* single mutants, and the resistance response of the complementation line  
223 of *pAtSWEET12:AtSWEET12* in the *atsweet11;12* double mutant was similar to that  
224 of the *atsweet11* single mutant. Thus, in the absence of *AtSWEET12*, *AtSWEET11*  
225 appears to participate in enhancing the bacterial number, which leads to plant  
226 susceptibility. These results point to *AtSWEET12* as one of the important players  
227 involved in plant defense against pathogen infection.

228

229 *In planta* green fluorescent protein (GFP)-labeled *Pst* DC3000 and *Pta* populations  
230 were monitored at 2 dpi. We found that the apoplast of *atsweet12* mutant plants  
231 supported high levels of *Pst* DC3000 and *Pta* populations compared to the wild type  
232 (Fig. 2g). However, the apoplast of *atsweet11* mutant plants supported almost similar  
233 levels of *Pst* DC3000 populations but fewer *Pta* populations than those of wild-type

234 plants (Fig. 2g). Moreover, in the apoplast of *atsweet11;12* double mutant plants, *Pst*  
235 DC3000 and *Pta* populations were much lower than those in wild-type plants (Fig.  
236 2g, Supplementary Fig. 8). Overall, our data from the microscopic studies  
237 corresponded with the results obtained from the bacterial multiplication assay in  
238 mutant and wild-type plants, indicating that the presence of AtSWEET12 is crucial in  
239 suppressing bacterial populations in the apoplast.

240

241 To determine whether mutation in *AtSWEET11* and *AtSWEET12* impacts the *in*  
242 *planta* multiplication of T3SS *hrcC*<sup>-</sup> mutants of *Pst* DC3000, *Psp*, and *Pta*, as well as  
243 avirulent strains of *Pst* DC3000 (*AvrRpt2*, *AvrRps4*, and *AvrRpm1*), bacterial  
244 multiplication assays were performed in mutant and wild-type plants. Similar to the  
245 response observed for *Pst* DC3000, *Psp*, and *Pta*, the *in planta* bacterial number of  
246 *hrcC*<sup>-</sup> mutants of these pathogens was lower in *atsweet11* and *atsweet11;12*  
247 mutants and higher in the *atsweet12* mutant compared to the wild type  
248 (Supplementary Fig. 9). These results indicate that the enhanced susceptibility of  
249 *hrcC*<sup>-</sup> strains in *atsweet12* mutants is not dependent on effectors. Moreover, in the  
250 case of avirulent strains, no significant difference was observed in the bacterial  
251 multiplication number of *Pst* DC3000 (*AvrRpt2*, *AvrRps4*, and *AvrRpm1*) in  
252 *atsweet11* and *atsweet12* mutants compared to the wild type (Supplementary Fig.  
253 10). This result suggests that the absence of *AtSWEET11* or *AtSWEET12* does not  
254 impact the *R* gene-mediated defense response against avirulent pathogens carrying  
255 the corresponding *avr* genes.

256

### 257 **Sucrose limitation in the mutant apoplast affects bacterial multiplication**

258 To understand the relation between the bacterial multiplication pattern and sucrose  
259 availability, apoplastic sugar levels were estimated. Consistent with the involvement  
260 of AtSWEET11 and AtSWEET12 in sucrose transport, the relative and absolute  
261 apoplastic sucrose levels in the leaves of *atsweet11* and *atsweet11;12* mutant plants  
262 were half of those in wild-type plants (Fig. 3a, Supplementary Fig. 11). However, in  
263 the *atsweet12* mutant plants, the apoplastic sucrose levels were indistinguishable  
264 from those of the wild type (Fig. 3a, Supplementary Fig. 11). We further confirmed  
265 the difference in the sucrose levels in the apoplast obtained from mutant and wild-  
266 type plants by measuring the specific luminescence using lux-based sucrose  
267 biosensors<sup>25</sup>. We found that the specific luminescence intensity was lower in the

Fig. 3

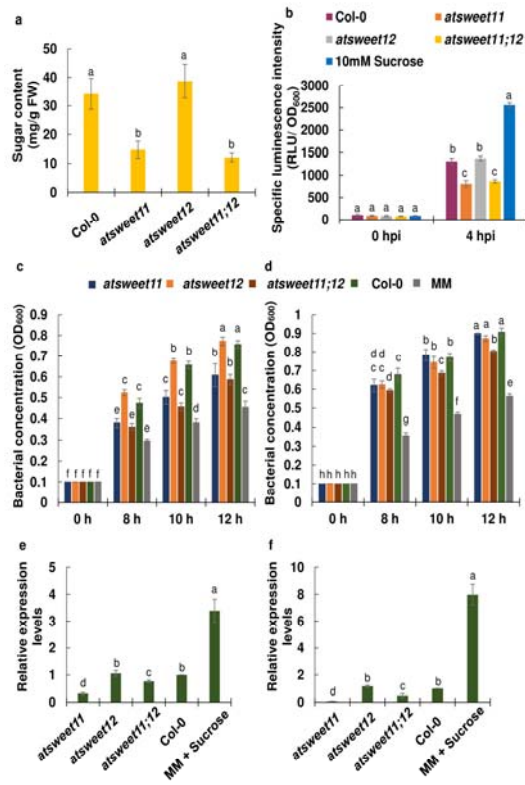

**Fig. 3 Apoplastic sucrose levels in mutant and wild-type plants impact the *in vitro* bacterial multiplication and sucrose utilization by bacteria.**

**a** The absolute level of apoplastic sucrose was measured by a sugar quantification kit. **b** The estimation of specific luminescence intensities of sucrose biosensors from *R. leguminosarum* grown in the apoplast obtained from *atsweet11*, *atsweet12*, *atsweet11;12* and wild-type (Col-0) plants. Bacteria were inoculated in the apoplast extracts such that the  $OD_{600}$  at 0 hour time point was maintained at 0.1 ( $OD_{600} = 0.1$ ). Bacterial cultures were incubated at 28 °C, and relative luminescence (expressed as RLU) and  $OD_{600}$  was measured at 0 and 4 hpi. The specific luminescence intensity was calculated as  $RLU / OD_{600}$ . The 10mM sucrose was used as a positive control. **c** and **d** *In vitro* quantification of **(c)** *Psp* and **(d)** *Pst* DC3000 multiplication in apoplast extract of *atsweet11*, *atsweet12*, *atsweet11;12* and wild-type (Col-0). The apoplast was extracted from 32-day-old mutant and wild-type plants by the vacuum-infiltration and centrifugation method. Bacteria were inoculated in minimal medium M9 (MM) supplemented with 5 % apoplast extracts such that the  $OD_{600}$  at 0 hour time point was maintained at 0.1 ( $OD_{600} = 0.1$ ). Bacterial cultures were incubated at 28 °C, and  $OD_{600}$  was measured at 0, 8, 10, and 12 hpi. **(e)** and **(f)** The transcript levels of the *scrY* gene (gene ID: *Psp*, PSPPH5187; *Pst* DC3000; PSPTO0890) were studied in **(e)** *Psp* and **(f)** *Pst* DC3000 grown *in vitro* in MM supplemented with apoplast extract of *atsweet11*, *atsweet12*, *atsweet11;12*, and wild-type (Col-0), and sucrose (50 mM). The bacteria were inoculated in MM supplemented with 5 % apoplast extracts and sucrose at 50 mM concentration ( $OD_{600} = 0.1$  at 0 hpi). The bacterial culture was incubated at 28 °C. The bacterial cells were harvested at 10 hpi and bacterial RNA was isolated. The relative transcript levels were measured by RT-qPCR. The expression values were normalized against the reference gene, *16S rRNA* (*Psp*: PSPPH\_0689; *Pst* DC3000: PSPTO01), and the relative expression levels (RO) were obtained over bacteria grown in Col-0 apoplast. Bars represent the transcript expression pattern of genes. In **a**, **b**, **e** and **f**, significant difference ( $P < 0.05$ ) after applying one-way ANOVA and Tukey's correction are indicated by different letters. For **a**, **e** and **f** data were obtained from the mean of three biological replicates ( $n = 3$ ), and error bars show the SEM. The experiment was repeated twice, and consistent results were observed. For **b**, data were obtained from the mean of seven biological replicates ( $n = 7$ ) and two technical replicates, and error bars show the SEM. The experiment was repeated thrice, and consistent results were observed. In **c** and **d** significant differences ( $P < 0.05$ ) after applying two-way ANOVA and Tukey's correction are indicated by different letters. The mean of five biological replicates ( $n = 5$ ) was obtained, and error bars show the SEM. The experiment was performed thrice, with consistent results.

269 and *atsweet12* mutant plants (Fig. 3b). Thus, the reduced accumulation of sucrose in  
270 the apoplast of *atsweet11* and *atsweet11;12* mutant plants concurred with the  
271 decreased bacterial multiplication in these mutant plants. In addition, the mutation in  
272 *AtSWEET11* reduced apoplastic sucrose levels, but the mutation in *AtSWEET12*  
273 alone showed no alteration in sucrose levels, indicating that *AtSWEET11* might be  
274 actively participating in sucrose transport, unlike *AtSWEET12*.

275

276 Minimal medium M9 (MM) supplemented with apoplastic fluids from the leaves of  
277 *atsweet11* and *atsweet11;12* mutant plants supported less *Psp* and *Pta* multiplication  
278 compared to the wild type (Fig. 3c, Supplementary Fig. 12). No significant difference  
279 was observed for *Psp* and *Pta* multiplication in apoplastic fluids from the *atsweet12*  
280 mutant compared to wild-type plants (Fig. 3c, Supplementary Fig. 12). Moreover, for  
281 *Pst* DC3000, *in vitro* bacterial multiplication in apoplastic fluid was found to be similar  
282 in the leaves of *atsweet11* and *atsweet12* mutants and the wild type. However, the  
283 apoplastic fluids from *atsweet11;12* leaves supported less *Pst* DC3000 multiplication  
284 compared to the wild type (Fig. 3d). These results indicate that less sucrose  
285 availability in the apoplast impedes *in vitro* bacterial multiplication. Moreover, the *in*  
286 *vitro* bacterial multiplication of *Psp*, *Pta*, and *Pst* DC3000 in MM supplemented  
287 individually with sucrose, glucose, and fructose indicated that sucrose and glucose  
288 were the preferred energy sources for these pathogens (Supplementary Fig. 13).  
289 Overall, the *in vitro* bacterial quantification studies clearly suggested that the  
290 mutation in *AtSWEET11* reduced sucrose levels and *in vitro* bacterial multiplication  
291 in the apoplast. However, the mutation in *AtSWEET12* did not impact the sucrose  
292 levels or *in vitro* bacterial multiplication in the apoplast. Hence, during plant defense,  
293 *AtSWEET12* is involved in controlling the *AtSWEET11*-mediated sucrose efflux in  
294 the apoplast to restrict pathogen multiplication.

295

296 The bacterial gene *scrY* (*Psp*: PSPPH5187; *Pst* DC3000: PSPTO0890) encodes  
297 sucrose porin, which is involved in sucrose uptake inside bacterial cells. We  
298 performed a comparative analysis of the sucrose utilization ability of the bacterial  
299 pathogens in the apoplast obtained from mutant and wild-type plants by studying the  
300 transcript level of *scrY*. *scrY* expression in *Psp* and *Pst* DC3000 grown in apoplast  
301 extracts from *atsweet11* and *atsweet11;12* mutants was significantly lower than that  
302 in wild-type plants (Fig. 3e, f). However, no significant difference was observed in the



303 expression level of this gene in *Psp* and *Pst* DC3000 grown in apoplast extracts from  
304 the *atsweet12* mutant compared to the wild type. Moreover, the expression of *scrY* in  
305 *Psp* and *Pst* DC3000 grown in MM supplemented with sucrose was significantly  
306 higher than that in MM supplemented with the apoplast extract from wild-type plants  
307 (Fig. 3e, f). This shows the correlation between sucrose availability in the apoplast  
308 and the sucrose utilization ability of the bacterial pathogens owing to the expression  
309 of genes involved in sucrose uptake. The low expression level of bacterial sucrose  
310 porin gene and low sucrose utilization ability of bacteria in the mutant apoplast  
311 indicate the low sucrose availability in the apoplast from the mutant which led to less  
312 bacterial multiplication.

313

### 314 **Plant defense deprives nonhost pathogens by restricting sucrose supply in** 315 **the apoplast**

316

317 To understand the impact of pathogen infection on the dynamics of apoplastic  
318 sucrose levels, we studied the sucrose levels of apoplastic fluids obtained at 24 hpi  
319 from mock-treated and pathogen-infected leaves of *atsweet11* and *atsweet12*  
320 mutants and wild-type plants. As expected, the apoplastic sucrose levels were  
321 significantly reduced in wild-type plants after nonhost pathogen infection compared  
322 to the mock treatment (Fig. 4a). Besides, in *atsweet11* mutant plants, apoplastic  
323 sucrose levels remained unaltered after nonhost pathogen infection (Fig. 4a).  
324 However, in *atsweet12* mutant plants, the apoplastic sucrose levels increased  
325 significantly after nonhost pathogen infection compared to the mock treatment (Fig.  
326 4a, b). This suggests that plant defense against nonhost pathogens involves the  
327 function of AtSWEET12 in limiting sucrose availability in the apoplast to suppress  
328 pathogen multiplication. Further, in case of host pathogen infection, the apoplastic  
329 sucrose levels were significantly reduced in the infected leaves of the *atsweet11* and  
330 *atsweet12* mutants and wild-type plants compared to the mock treatment (Fig. 4a).  
331 Based on this result, we speculate that the reduction in apoplastic sucrose levels in  
332 any genotype after host pathogen infection might be the result of sugar acquisition  
333 by the host pathogen for nutrition<sup>12</sup>.

334

335 Next, we wanted to confirm whether plants restrict the sucrose availability in the  
336 apoplast as a defense response against nonhost bacterial pathogens. *In vitro*

Fig. 4

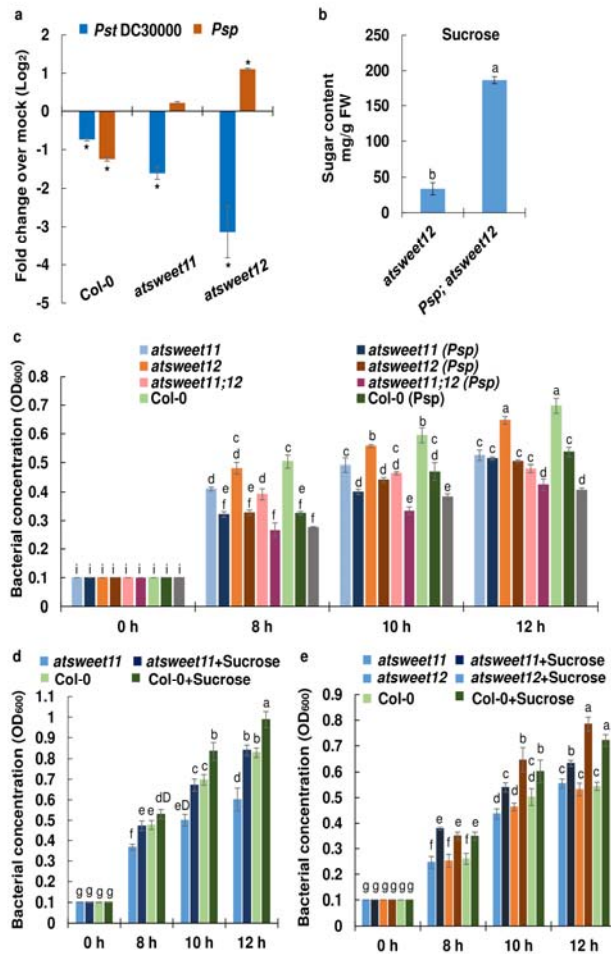

**Fig. 4 Sucrose is the limiting factor responsible for restricting the nonhost pathogen multiplication in the apoplast**

**a** The apoplastic sucrose levels after host and nonhost pathogen infection in wild-type, *atsweet11* and *atsweet12* mutant plants over their respective mock-treated plants are presented. The 32-d-old *Arabidopsis atsweet11*, *atsweet12* mutant and wild-type plants were inoculated with sterile water as mock, host pathogen *Pst* DC3000 at  $5 \times 10^5$  CFU/mL, and nonhost pathogen, *Psp* at  $1 \times 10^6$  CFU/mL. Samples were harvested at 24 hpi. The apoplastic fluids from wild-type and mutant plants were obtained by vacuum infiltration and centrifugation method. The sucrose levels were estimated by using gas chromatography-mass spectrometry (GC-MS). The relative abundance of sugars were estimated by using ribitol as an internal standard. **b** The absolute sucrose content was measured in the apoplast obtained from *atsweet12* mutant plants inoculated with sterile water as mock and *Psp* at  $1 \times 10^6$  CFU/mL at 24 hpi by sugar estimation kit. **a, b** Asterisks indicate a significance difference from respective mock-treated plants (student's *t* test;  $*P < 0.05$ ). Data were obtained from the mean of total three biological replicates ( $n=3$ ) and error bars show  $\pm$  standard error of mean. The experiment was repeated twice and consistent results were observed. **c** *In vitro* quantification of *Psp* multiplication was done in the apoplast extract obtained at 8 h after infection with *Psp* and sterile water in *atsweet11*, *atsweet12*, *atsweet11;12*, and wild-type (Col-0) plants. The apoplastic extracts were isolated by the vacuum-infiltration and centrifugation method. Bacteria were inoculated in MM supplemented with 5% apoplast extracts ( $OD_{600} = 0.1$  at 0 hpi). The bacterial culture was incubated at 28 °C, and  $OD_{600}$  was measured at 0, 8, 10 and 12 hpi. **d** *In vitro* quantification of *Psp* multiplication in the apoplast extract of *atsweet11* and wild-type (Col-0) plants after 1% sucrose addition in the apoplast. The apoplast was extracted from 32-day-old mutant and wild-type (Col-0) plants by vacuum-infiltration and centrifugation. **e** *In vitro* quantification of *Psp* multiplication after sucrose addition in the apoplast extract obtained 8 hpi with *Psp* and sterile water (used as the mock treatment) in *atsweet11*, *atsweet12*, and wild-type (Col-0) plants. The apoplast was extracted from *Psp* and mock-treated mutant and wild-type (Col-0) plants by vacuum-infiltration and centrifugation. *Psp* was inoculated in MM supplemented with 5% apoplast extract and 1% sucrose ( $OD_{600} = 0.1$  at 0 hpi). Bacterial cultures were incubated at 28 °C, and  $OD_{600}$  was measured at 0, 8, 10, and 12 hpi. For **c, d** and **e** significant differences ( $P < 0.05$ ) after applying two-way ANOVA and Tukey's correction are indicated by different letters. Data were obtained from the mean of five biological replicates ( $n = 5$ ), and error bars show the SEM. The experiment was repeated thrice, and consistent results were observed.

337 bacterial quantification was performed for *Psp* and *Pst* DC3000 individually in MM



338 supplemented with apoplastic fluid extracted from wild-type and mutant (*atsweet11*,  
339 *atsweet12*, *atsweet11;12*) leaves infected with *Psp* and *Pst* DC3000, respectively.  
340 Apoplastic fluids from nonhost pathogen-infected leaves of mutant and wild-type  
341 plants were found to support less multiplication of the nonhost pathogen than the  
342 apoplastic fluids from the respective mock-treated leaves (Fig. 4c). However, in the  
343 case of host pathogens, no significant difference was observed (Supplementary Fig.  
344 14). These results suggest that plants limit sugar levels in the apoplast as a defense  
345 response against nonhost pathogens, eventually preventing *in vitro* multiplication  
346 due to sugar deficiency in the apoplastic fluids.

347

348 To determine whether relieving the sucrose limitation in the apoplast extract from  
349 mutants can recover *in vitro* bacterial multiplication, we quantified bacteria after  
350 externally adding sucrose to the apoplast extracts. The sucrose supplementation in  
351 the apoplast extracts of *atsweet11* mutant leaves supported more *Psp* multiplication  
352 compared to the apoplast extracts of *atsweet11* mutant leaves without external  
353 sucrose addition. Interestingly, *Psp* multiplication in the apoplast of the *atsweet11*  
354 mutant with external sucrose was found to be similar to that observed in the apoplast  
355 from wild-type plants (Fig. 4d). These results indicate that the addition of sucrose in  
356 the apoplast of the *atsweet11* mutant relieved the sucrose limitation caused by the  
357 absence of AtSWEET11 and restored *in vitro* bacterial multiplication similar to the  
358 level observed in the apoplast from wild-type plants.

359 We also verified whether sucrose limitation in the apoplast from nonhost pathogen-  
360 infected plants was responsible for reduced *in vitro* bacterial multiplication and could  
361 be recovered by sucrose addition. We found that the external sucrose  
362 supplementation in apoplast fluids from nonhost pathogen-infected leaves of  
363 *atsweet11* and *atsweet12* mutant and wild-type plants supported more *Psp*  
364 multiplication *in vitro* compared to the respective mutant and wild-type apoplast fluids  
365 without sucrose (Fig. 4e). These results further suggest that plants limit sucrose  
366 availability to nonhost pathogens in the apoplast to restrict nonhost pathogen  
367 multiplication, and external sucrose supplementation in the apoplast restores *in vitro*  
368 bacterial multiplication.

369

370 ***In planta* sucrose addition restored bacterial multiplication in mutants to wild-**  
371 **type levels**

372 We next explored whether sucrose is the limiting factor for reduced *in planta*  
373 bacterial multiplication in *atsweet11* and *atsweet11;12* mutant plants. After *in planta*  
374 addition of 0.2% sucrose, both *atsweet11* and *atsweet11;12*, supported more *Psp*  
375 multiplication compared to mutant plants without sucrose treatment (Fig. 5a).  
376 Interestingly, after sucrose addition, *Psp* multiplication in these mutant plants was  
377 significantly higher than in wild-type plants without sucrose treatment at 3 dpi (Fig.  
378 5a). Similarly, after the addition of 1% sucrose in the *atsweet11* and *atsweet11;12*  
379 mutant plants, *Psp* multiplication was significantly higher, and chlorotic disease  
380 symptoms were observed, indicating higher plant susceptibility compared to mutant  
381 and wild-type plants without exogenous sucrose treatment (Fig. 5a, b). Despite *Psp*  
382 being a nonhost pathogen, the addition of sucrose in wild-type plants enhanced *Psp*  
383 multiplication compared to wild-type plants without sucrose treatment. These results  
384 indicate that the resistant phenotype of the *atsweet11* and *atsweet11;12* mutant and  
385 wild-type plants was reverted to the susceptible phenotype after *in planta* sucrose  
386 addition, and that sucrose is the limiting factor for nonhost pathogen multiplication in  
387 the apoplast of these mutant and wild-type plants. In case of *atsweet12* mutants,  
388 only at a higher concentration of sucrose, *Psp* multiplication was increased  
389 compared to the *atsweet12* mutant without sucrose treatment (Fig. 5a). This  
390 indicates that due to the absence of AtSWEET12, the AtSWEET11-mediated  
391 sucrose efflux is not controlled, and enough sucrose was available to the nonhost  
392 pathogen in the apoplast of *atsweet12* mutants; therefore, exogenous sucrose  
393 addition only at higher concentrations increased the multiplication of the nonhost  
394 pathogen.

395 In the case of the host pathogen *Pst* DC3000, exogenous sucrose addition both at  
396 0.2% and 1% concentration in *atsweet11;12* supported more *Pst* DC3000  
397 multiplication compared to mutant and wild-type plants without sucrose treatment.  
398 Correspondingly, the *atsweet11;12* mutants after sucrose addition at a higher  
399 concentration showed severe chlorosis compared to mutant and wild-type plants  
400 without sucrose treatment (Fig. 5d). In the case of *atsweet11* mutants with  
401 exogenous sucrose addition, a significant increase in *Pst* DC3000 multiplication was  
402 observed at 2 dpi, and more chlorosis was seen compared to the *atsweet11* mutant

Fig. 5

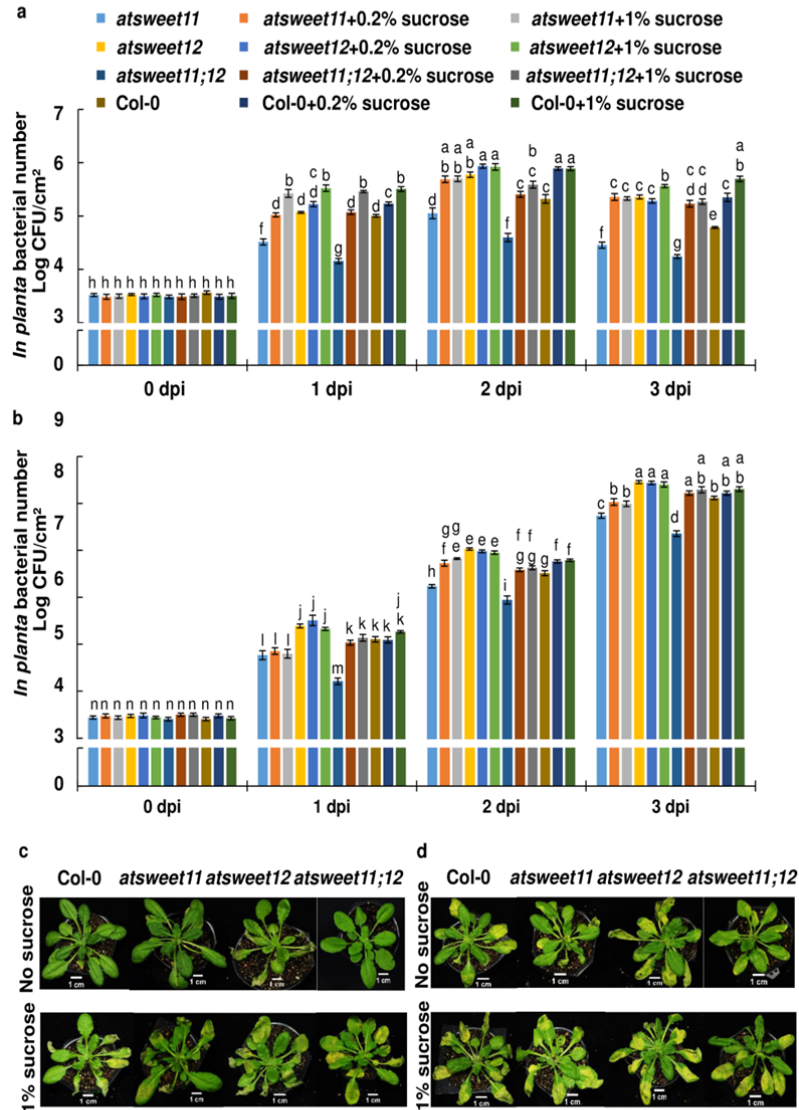

**Fig. 5** Pathogen multiplication in mutants is reverted to wild-type levels upon *in planta* sucrose addition.

**a** *In planta* bacterial multiplication was estimated in 32-day-old *Arabidopsis* *atsweet11*, *atsweet12*, and *atsweet11;12* mutants and wild-type plants inoculated with the nonhost pathogen *Psp* alone, co-inoculated with *Psp* and 0.2 % sucrose, and co-inoculated with *Psp* and 1 % sucrose. **b** *In planta* bacterial multiplication was estimated in 32-day-old *atsweet11*, *atsweet12*, and *atsweet11;12* mutants and wild-type plants inoculated with the host pathogen *Pst* DC3000 alone, co-inoculated with *Pst* DC3000 and 0.2 % sucrose, and co-inoculated with *Pst* DC3000 and 1 % sucrose. For **(a)** and **(b)**, the bacterial population was monitored by plating serial dilutions of leaf extracts at 0, 1, 2, and 3 dpi. Significant differences ( $P < 0.05$ ) after applying two-way ANOVA and Tukey's correction are indicated by different letters. Data were obtained from the mean of six biological replicates and two technical replicates. Error bars show the standard error of mean (SEM). The *in planta* bacterial number was expressed as log<sub>10</sub> values. **c** Phenotypes of mutant and wild-type plants inoculated with the nonhost pathogen *Psp* alone and co-inoculated with *Psp* and 1 % sucrose. **d** Phenotypes of mutant and wild-type plants inoculated with the host pathogen *Pst* DC3000 alone and co-inoculated with *Pst* DC3000 and 1 % sucrose. For **(c)** and **(d)**, photographs were taken at 3 dpi. The experiment was repeated twice, and consistent results were observed.

403 and wild-type plants without sucrose treatment (Fig. 5b, d). Together, these results

404 clearly indicate that sucrose was the limiting factor for host pathogen multiplication in  
405 *atsweet11* and *atsweet11;12* mutant plants, and exogenous sucrose addition  
406 alleviated the sucrose limitation in the apoplast, thereby leading to increased  
407 pathogen multiplication. Moreover, in *atsweet12* mutant and wild-type plants,  
408 exogenous sucrose addition at high or low concentrations did not show significant  
409 differences in *Pst* DC3000 multiplication compared to *atsweet12* mutant and wild-  
410 type plants without sucrose treatment, respectively (Fig. 5b). Accordingly, we  
411 surmise that in *atsweet12* and wild-type plants, sucrose availability might be  
412 adequate for a host pathogen to multiply in the apoplast; therefore, exogenous  
413 addition of sucrose in these plants did not cause any difference in pathogen  
414 multiplication.

415

#### 416 **Plasma membrane targeting of AtSWEET12 with a concomitant reduction in** 417 **AtSWEET11 led to plant defense**

418 Since our study indicated the differential role of AtSWEET11 and AtSWEET12 in  
419 plant defense, we next assessed the localization pattern of AtSWEET11 and  
420 AtSWEET12 protein in Arabidopsis plants carrying *AtSWEET11:AtSWEET11-GUS*  
421 and *AtSWEET12:AtSWEET12-GUS* transgenes after nonhost and host pathogen  
422 infection. Histochemical localization by the GUS reporter assay indicated that  
423 AtSWEET11 transporters were well expressed in the vascular tissue, including the  
424 major and minor veins, of mock-treated *AtSWEET11:AtSWEET11-GUS* transgenic  
425 plants (Fig. 6a). After *Psp*, *Pta*, and *Pst* DC3000 infection, the expression of  
426 AtSWEET11 protein was reduced, as indicated by the reduction in GUS staining in  
427 the major and minor veins at 36 hpi and 48 hpi (Fig. 6a, Supplementary Figs. 15a, c,  
428 16a). In contrast, the expression of AtSWEET12 protein was barely detected in the  
429 major and minor veins of mock-treated plants carrying *AtSWEET12:AtSWEET12-*  
430 *GUS* transgenes (Fig. 6b). However, *AtSWEET12* transcripts were well expressed  
431 under normal conditions (Supplementary Fig. 5c). The difference in transcript and  
432 protein level might be due to posttranslational regulation of transporters<sup>26</sup>. Moreover,  
433 after bacterial infection, irrespective of host and nonhost pathogen, AtSWEET12  
434 protein expression was induced, as indicated by GUS staining in the major and  
435 minor veins at 36 hpi and 48 hpi (Fig. 6b, Supplementary Fig. 15b, d, 16b). Thus,

Fig. 6

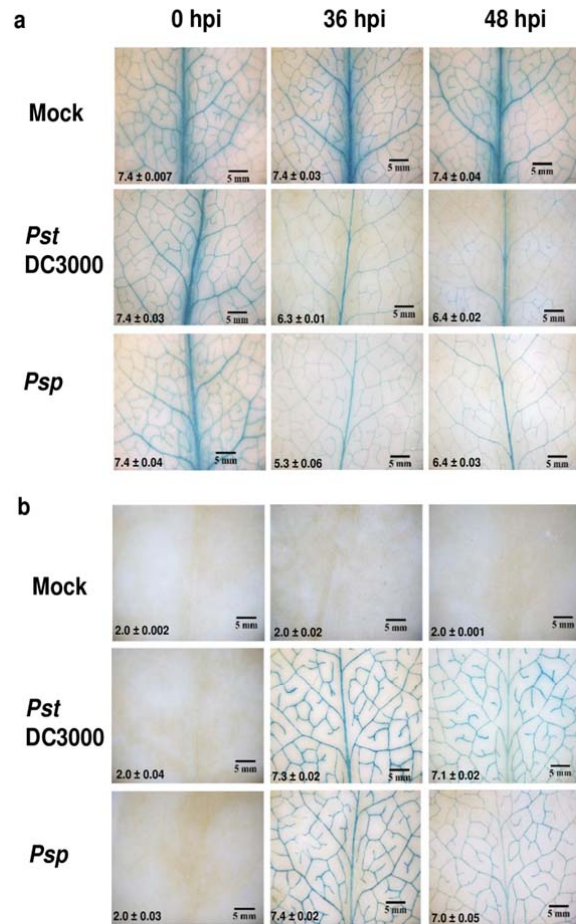

**Fig. 6 Accumulation of AtSWEET11 and AtSWEET12 transporters after pathogen infection.**

**a** and **b** The expression of AtSWEET11-GUS and AtSWEET12-GUS translational fusion proteins in the leaf veins was studied by a  $\beta$ -glucuronidase assay. Leaves of 32-day-old Arabidopsis plants expressing stable translational fusion of **(a)** *AtSWEET11:AtSWEET11-GUS* and **(b)** *AtSWEET12:AtSWEET12-GUS* were syringe-inoculated with sterile water (mock), *Pst* DC3000 at  $5 \times 10^5$  CFU/mL, and *Psp* at  $1 \times 10^6$  CFU/mL. Samples were collected at 0, 36, and 48 hours post inoculation (hpi). Photographs were taken at 1X magnification after GUS staining, and the stained area was scored by ImageJ software (<http://imagej.nih.gov/ij/>). The intensity values were calculated and presented at the bottom of the image. The intensity was depicted as  $\log_{10}$  values obtained from the mean  $\pm$  SEM of three biological replicates. The experiment was repeated thrice, and consistent results were observed.



437 concomitant suppression of AtSWEET11 to restrict bacterial multiplication.

438

439 In the GUS-based localization study, AtSWEET12 protein was barely detected in the  
440 leaves under normal conditions (Fig. 6b). However, the *AtSWEET12* gene was well  
441 expressed in the leaves of control wild-type plants (Supplementary Fig. 5).  
442 Therefore, we wanted to determine the cellular localization and accumulation status  
443 of AtSWEET12 protein in transgenic Arabidopsis plants expressing  
444 *p35S:AtSWEET12-eYFP* under normal and pathogen-infected conditions. We found  
445 that the AtSWEET12 protein was localized to the plasma membrane in the mock-  
446 and pathogen-treated AtSWEET12-YFP overexpression plants (Fig. 7a,  
447 Supplementary Fig. 17). Surprisingly, the mock-treated control leaf showed less  
448 localization of the AtSWEET12 transporter in the plasma membrane (Fig. 7a). We  
449 also observed that many AtSWEET12 proteins were localized to intracellular vesicles  
450 in the mock-treated control leaf samples. However, after nonhost and host pathogen  
451 infection at 48 hpi, the plasma membrane localization of the AtSWEET12 transporter  
452 increased (Fig. 7a). The amount of intracellular localized vesicles retaining  
453 AtSWEET12 protein also decreased in pathogen-infected leaves compared to mock-  
454 treated leaves (Fig. 7a). Overall, these findings indicate that even after constitutive  
455 expression of the *AtSWEET12* gene, plants regulate the abundance and localization  
456 of AtSWEET12 at the posttranslational level. During pathogen infection, plants  
457 regulate the activity of the AtSWEET12 transporter by increasing the plasma  
458 membrane targeting of AtSWEET12 protein to suppress pathogen multiplication. To  
459 further confirm that an increase in plasma membrane targeting of AtSWEET12 in an  
460 overexpression line restricts bacterial multiplication, we tested the response of an  
461 AtSWEET12 overexpression line (expressing *p35S:AtSWEET12-eYFP*) toward the  
462 nonhost pathogen *Psp* and host pathogen *Pst* DC3000. The *in planta* bacterial  
463 number of *Psp* and *Pst* DC3000 was significantly lower in the AtSWEET12  
464 overexpression line than in the wild type (Fig. 7b,c). *Pst* DC3000-infected  
465 AtSWEET12 overexpression plants showed markedly reduced chlorotic symptoms  
466 compared to the wild-type plants at 3 dpi (Fig. 7d). These results indicate that  
467 *AtSWEET12* overexpression led to plant defense against bacterial pathogens. We  
468 further tested the apoplastic sucrose levels in the AtSWEET12 overexpression line  
469 and observed an almost 50% reduction in the apoplastic sucrose content compared  
470 to the wild type (Fig. 7e). These results indicate that AtSWEET12 controls sucrose

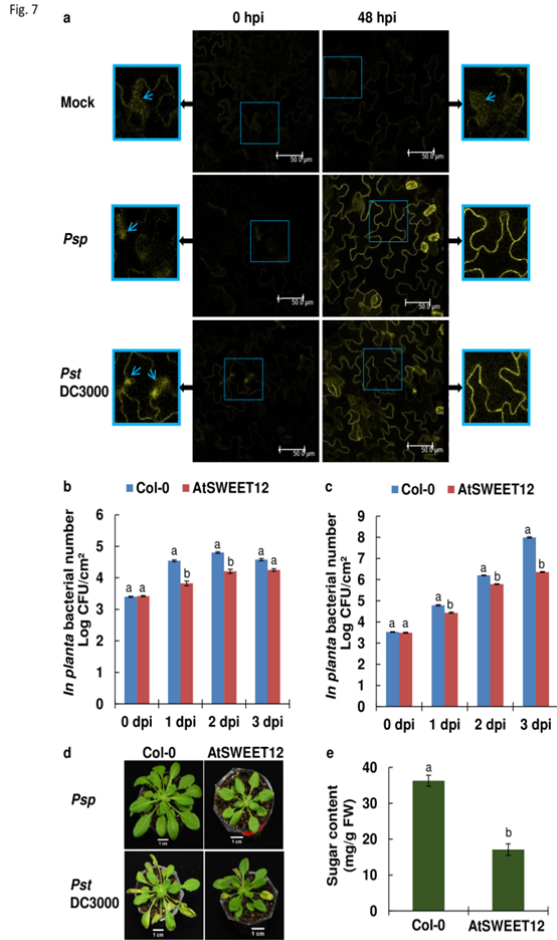

**Fig. 7 Pathogen exposure triggers plasma membrane targeting of AtSWEET12 protein leading to plant defense**

**a** The accumulation of AtSWEET12-YFP fusion proteins was analyzed by confocal microscope after inoculation with sterile water (mock), *Psp* at  $1 \times 10^6$  CFU/mL and *Pst* DC3000 at  $5 \times 10^5$  CFU/mL in the leaves of stable transgenic Arabidopsis plants expressing *p35S:AtSWEET12-eYFP*. Samples were collected at 0 and 48 hours post inoculation (hpi). The leaf samples were observed using a Leica TCS SP8 confocal microscope (excitation at 514 nm, fluorescence YFP signal was recorded between 525 and 560 nm). The images were taken using a 63X objective and analyzed by Leica microsystems LAS AF confocal software. The area highlighted by light blue color in the images (middle) was shown in the form of magnified images on left and right side respectively. Light blue color arrow indicates the localization of AtSWEET12-YFP fusion proteins to the intracellular vesicles in the cytoplasm. The bright field images were shown in Supplementary Fig. 16. The experiment was repeated twice, and consistent results were observed. **b** and **c** The leaves of 32-day-old Arabidopsis wild-type (Col-0) and AtSWEET12 overexpression transgenic plants (expressing *p35S:AtSWEET12-eYFP*) were inoculated with **(b)** the nonhost pathogen *Psp* at  $1 \times 10^6$  CFU/mL and **(c)** the host pathogen *Pst* DC3000 at  $5 \times 10^5$  CFU/mL. Bacterial multiplication assays were performed, and the bacterial populations were monitored by plating serial dilutions of leaf extracts at 0-, 1-, 2-, and 3-days post inoculation (dpi). *In planta* bacterial number was expressed as log<sub>10</sub> values. Data were obtained from the mean of six biological replicates and two technical replicates. Error bars show the standard error of the mean (SEM). **d** The sucrose levels were measured in the apoplast obtained from 32-day-old Arabidopsis wild-type (Col-0) and AtSWEET12 overexpression transgenic plants by a sugar quantification kit. Data were obtained from the mean of five biological replicates ( $n = 5$ ), and error bars show the SEM. **b**, **c** and **d** Significant differences ( $P < 0.05$ ) after applying one-way ANOVA and Tukey's correction are indicated by different letters. The experiment was repeated thrice, and consistent results were observed.

471 availability in the apoplast. Overall, these findings clearly suggest that plasma



472 membrane targeting of AtSWEET12 is required for plant defense against bacterial  
473 pathogens by limiting apoplastic sucrose levels.

474 **Heterooligomerization of AtSWEET11 and AtSWEET12 affects sucrose**  
475 **transport**

476 To determine the effect of heterooligomerization of AtSWEET12 with AtSWEET11 on  
477 sucrose transport activity, the growth of the sucrose uptake-deficient yeast strain  
478 SUSY7/ura3 coexpressing AtSWEET12 and AtSWEET11 was monitored on media  
479 containing sucrose as the only carbon source. When AtSWEET12 was coexpressed  
480 under a strong promoter (PMA promoter) and AtSWEET11 was expressed from a  
481 weaker promoter (ADH promoter) or vice-versa, SUSY7/ura3 growth was  
482 dramatically inhibited (Fig. 8a). To confirm the negative affect of  
483 heterooligomerization of AtSWEET12 and AtSWEET11 on sucrose transport activity  
484 as indicated by the growth assay in SUSY7/ura3 yeast cells, a concentration-  
485 dependent sucrose uptake assay was performed in SUSY7/ura3 yeast cells  
486 coexpressing AtSWEET12 and AtSWEET11. The analysis of the AtSWEET influx  
487 kinetics revealed a 20-fold reduction in  $V_{max}$  when AtSWEET12 and AtSWEET11  
488 were coexpressed, provided that AtSWEET12 was expressed under a strong  
489 promoter (Fig. 8b, c, e, Supplementary Fig. 18). A five-fold reduction in sucrose  
490 influx was observed when AtSWEET12 was expressed from a weaker promoter (Fig.  
491 8d, Supplementary Fig. 18). However, the  $K_M$  values for AtSWEET11 and  
492 AtSWEET12 transporters ranged from 71 mM to 79 mM, but they did not significantly  
493 differ from each other (Fig. 8, Supplementary Fig. 18). This inhibition of sucrose  
494 transport activity by AtSWEET12 with AtSWEET11 coexpression suggests that the  
495 heterooligomerization of AtSWEET12 with AtSWEET11 might be one of the  
496 regulatory mechanisms through which AtSWEET11-mediated sucrose efflux could  
497 be controlled by AtSWEET12 in the apoplast.

498

499

Fig. 8

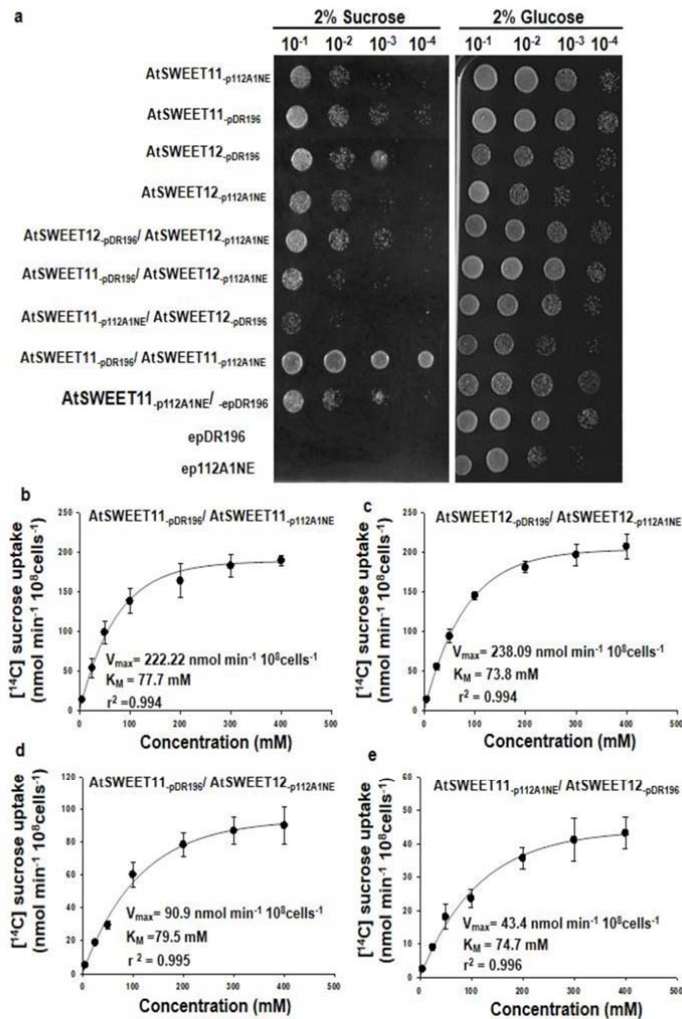

**Fig. 8 Coexpression of AtSWEET11 and AtSWEET12 transporters in yeast inhibits the sucrose transport activity.**

**a**, Growth of SUSY/URA3 (sucrose-deficient) yeast transformants expressing *AtSWEET11* and/or *AtSWEET12* either in the vector pDR196 or p112A1NE, and empty vector epDR196 or ep112A1NE on solid media containing 2% sucrose or 2% glucose (control). Images were captured after incubation at 30 °C for 4 days. The experiment was repeated at least three times **b-e**, Concentration-dependent (5mM, 25mM, 50mM, 100mM, 200mM, 300mM and 400mM) [<sup>14</sup>C] sucrose uptake activity was measured in SUSY/URA3 yeast cells coexpressing **(b)** *AtSWEET11* in vector pDR196 or p112A1NE, **(c)** *AtSWEET12* in vector pDR196 or p112A1NE, **(d)** *AtSWEET11* in vector pDR196 and *AtSWEET12* in vector p112A1NE, **(e)** *AtSWEET11* in vector p112A1NE and *AtSWEET12* in vector pDR196. The  $V_{max}$ ,  $K_M$  and R-squared ( $r^2$ ) values are presented in the graph. The  $r^2$  value gives the statistical measure of extent of variation between the two variable in a regression model. Significant differences ( $P < 0.0001$ ) after applying Student's t-test, ( $P < 0.005$ ) after applying one-way ANOVA. Data were obtained from the mean  $\pm$  standard error (SE) of six replicates ( $n=6$ ) (see Supplementary Dataset S1 for raw data). The experiment was repeated twice, and consistent results were observed.

501

502 The limitation of sugar availability to bacterial pathogens in the apoplast by  
503 regulating the sugar transporters involved in sugar efflux and uptake processes has  
504 been proposed as a potential plant defense strategy<sup>8,24</sup>. Recently, the role of the  
505 sugar uptake transporter AtSTP13—controlling glucose availability to *Pst* DC3000 in  
506 the apoplast—was implicated in plant defense<sup>13</sup>. However, the regulation of sugar  
507 efflux transporters to limit the sugars to bacterial pathogens has never been  
508 reported. Till date, several studies have indicated the modulation of SWEET sugar  
509 efflux transporters by pathogens to divert the release of sugars into the apoplast for  
510 their nutrition<sup>7,12,19,27,28</sup>. Here, we identified the role of AtSWEET12 in Arabidopsis  
511 defense against nonhost and host pathogens by regulating AtSWEET11-mediated  
512 sucrose efflux in the apoplast and limiting sucrose availability to bacterial pathogens.  
513 These two transporters are known to be involved in the apoplastic loading of  
514 mesophyll-synthesized sugars from phloem parenchyma into the phloem apoplast<sup>7</sup>.  
515 The effective regulation of these transporters by plants is needed to control the sugar  
516 levels in the apoplast, consequently limiting the availability of sugars to pathogens  
517 colonizing the apoplast.

518

519 Localization experiments using transgenic plants expressing  
520 *AtSWEET11:AtSWEET11-GUS* and *AtSWEET12:AtSWEET12-GUS* revealed a  
521 strong increase in the accumulation of AtSWEET11 protein and low detection of  
522 AtSWEET12 protein under normal conditions (Fig. 6). Besides, sugar estimation in  
523 the mutant and wild-type plants indicated that the apoplastic sucrose levels  
524 decreased only when *AtSWEET11* was mutated, while the sucrose levels remained  
525 unaltered when *AtSWEET12* was mutated (Fig. 3a, Supplementary Fig. 11). Thus,  
526 AtSWEET11 might be exclusively involved in sucrose transport into the apoplast,  
527 while AtSWEET12 is not. This is supported by the induction of *AtSWEET11*  
528 expression but not of *AtSWEET12* under high light when endogenous sucrose levels  
529 are increased<sup>29</sup>. Thus, AtSWEET11 might be intimately involved in the transport of  
530 sucrose to the apoplast during the phloem loading process. Moreover, we predicted  
531 a critical role of AtSWEET12 in regulating AtSWEET11-mediated sucrose transport  
532 in the apoplast, leading to sucrose limitation during bacterial pathogen infection. The  
533 induction of AtSWEET12 and reduction in AtSWEET11 after bacterial pathogen  
534 infection, together with the increased pathogen multiplication in the apoplast of

535 *atsweet12* mutants and decreased pathogen multiplication in the apoplast of  
536 *atsweet11* mutants, suggest that the control of apoplastic sucrose levels is  
537 coordinated by AtSWEET12. This is further supported by the reduced apoplastic  
538 sucrose content and stunted phenotype of the AtSWEET12 overexpression line (Fig.  
539 7e, Supplementary Fig. 19). We speculate that due to the overexpression of  
540 AtSWEET12, the AtSWEET11-mediated sucrose transport in the apoplast is  
541 hindered, which affects apoplastic phloem loading and thereby yields the growth  
542 defect phenotype of AtSWEET12-overexpressing plants (Supplementary Fig. 19).  
543 Besides, AtSWEET12 might be involved in the regulation of AtSWEET11, as both  
544 the proteins are co-expressed and interact with each other<sup>6</sup> (Fig.9; Supplementary  
545 Figs. 20–22).

546

547 Consistent with the *atsweet11;12* double mutant exhibiting reduced susceptibility to  
548 the necrotrophic fungus *Colletotrichum higginsianum*<sup>30</sup> and protist *Plasmodiophora*  
549 *brassicae*<sup>31</sup>, we found that the *atsweet11;12* double mutant exhibited a resistance  
550 response towards bacterial pathogens as well (Fig. 2). Moreover, our studies on  
551 *atsweet12* mutants and an AtSWEET12 overexpression line confirm the role of  
552 AtSWEET12 in plant defense by depriving bacterial pathogens of sugars in the  
553 apoplast. The decreased bacterial multiplication and reduced apoplastic sucrose  
554 levels in *atsweet11* single and *atsweet11;12* double mutants suggest that  
555 AtSWEET11 may contribute to allowing sugar availability to pathogens in the  
556 apoplast. The activation of AtSWEET12 and suppression of AtSWEET11 by plant  
557 limits sucrose in the apoplast, which restricts pathogen multiplication.

558

559 The sugar utilization profiles of *P. syringae* strains indicate that these bacteria prefer  
560 sucrose as a nutrient source under *in vitro* conditions<sup>1</sup> (Supplementary Fig. 12).  
561 Accordingly, sucrose limitation might be one of the nonhost resistance strategies  
562 employed by plants against nonhost pathogens<sup>2</sup>. Our results validated this  
563 hypothesis by demonstrating lower *in vitro* multiplication of bacteria in the apoplast  
564 obtained from nonhost pathogen-infected leaves (Fig. 4c). This was further  
565 supported by the fact that relieving the sucrose limitation in the apoplast by  
566 exogenous addition of sucrose restored *in vitro* bacterial multiplication (Fig. 4d, e).  
567 Correspondingly, we found that *in planta* sucrose addition rescued nonhost and host  
568 bacterial multiplication in mutants to the wild-type level, which suggests that sucrose

569 is the limiting factor responsible for reduced *in planta* bacterial multiplication in  
570 *atsweet11* and *atsweet11;12* mutant plants (Fig. 5). Overall, our study clearly  
571 showed that sucrose is crucial for bacterial pathogen multiplication, and that sucrose  
572 limitation is one of the defense strategies used by plants to combat nonhost and host  
573 bacterial pathogens.

574

575 PAMP-mediated activation of STP13 controls apoplastic sugar levels, thereby  
576 restricting bacterial pathogen multiplication in the apoplast<sup>13</sup>. Similarly, we found that  
577 the plant regulates AtSWEET11 and AtSWEET12 after PAMP perception, as  
578 indicated by the strong induction of *AtSWEET12* and down regulation of  
579 *AtSWEET11* after treatment with PAMPs and FLG22 and *hrcC*<sup>-</sup> mutant strains  
580 (Supplementary Fig. 5). The plant immune responses are initiated after PAMPs  
581 including FLG22 are recognized by pattern-recognition receptors (PRRs) like  
582 flagellin-sensitive 2 (AtFLS2) at the plasma membrane. The *in vivo* interaction  
583 studies revealed that FLG22 treatment induced the interaction of AtFLS2 with  
584 AtSWEET11 or AtSWEET12 which are localized on the plasmamembrane  
585 (Supplementary Fig. 23). This indicate that after PAMP perception AtFLS2 may  
586 directly modulate the activity of AtSWEET11 and AtSWEET12 proteins. The plant  
587 defense strategies may involve the PAMP-mediated regulation of AtSWEET11 and  
588 AtSWEET12 transporters that controls the apoplastic sucrose levels to prevent  
589 bacterial multiplication.

590

591 Besides, basal defense and *R* gene-mediated resistance are largely related, sharing  
592 defense pathways, including the salicylic acid (SA)-mediated defense response<sup>32,33</sup>.  
593 However, in the *atsweet12* mutant, the *R* gene-mediated resistance against avirulent  
594 pathogens remains functional, indicating that the *R* gene-mediated defense pathway  
595 is independent of AtSWEET12-mediated plant defense by apoplastic sucrose  
596 limitation (Supplementary Fig. 10). Furthermore, SA accumulation and SA-mediated  
597 signaling play a crucial role in PTI, contributing to plant defense. The resistance in  
598 the *atsweet11;12* mutant was recently attributed to high levels of SA accumulation  
599 and the activation of the SA pathway<sup>30</sup>. Consistent with this, we found the  
600 upregulation of genes related to SA accumulation and the SA-mediated defense  
601 signaling pathway, namely, *enhanced disease susceptibility 1 (EDS1)* and  
602 *pathogenesis-related 1 (PR1)*, in the *atsweet11;12* mutant compared to the wild type

603 (Supplementary Fig. 24). However, SA is not the only factor contributing to the  
604 resistance in the *atsweet11;12* mutant. In the *atsweet12* mutant, SA levels were  
605 comparable to wild-type levels<sup>30</sup>, and the expression levels of *PR1* and *EDS1* were  
606 higher than those in the wild type (Supplementary Fig. 25). Thus, the SA pathway is  
607 not affected in *atsweet12* mutants. Through virus-induced gene silencing of *AtSID2*,  
608 the SA biosynthesis gene encoding isochorismate synthase in *atsweet12* mutant  
609 plants showed more *Pst* DC3000 multiplication and higher sucrose levels than in  
610 *atsweet12* mutant plants (Supplementary Figs. 25, 26). Given these findings, SA-  
611 mediated signaling could be one of the upstream components but not directly  
612 involved in regulating sucrose availability in the apoplast in response to pathogen  
613 infection.

614

615 Moreover, the regulation of transporters may occur at the posttranslational level<sup>26</sup>.  
616 YFP-based localization in the AtSWEET12 overexpression line revealed that under  
617 normal conditions, AtSWEET12 is retained inside the intracellular vesicle rather than  
618 at the plasma membrane, and that pathogen infection triggers more plasma  
619 membrane targeting of AtSWEET12 (Fig. 7a). Accordingly, we surmise that  
620 Arabidopsis might regulate the localization and abundance of AtSWEET12 at the  
621 plasma membrane by constant endocytosis, recycling, and protein degradation.  
622 Future studies are needed to explore the mechanisms involved in regulating the  
623 abundance of AtSWEET12 proteins. Further, oligomerization has been identified to  
624 be necessary for the function of AtSWEETs, and AtSWEET11 homooligomerizes to  
625 form a functional pore that allows the transport of sucrose<sup>34</sup>. Besides, the  
626 oligomerization of functional AtSWEET1 with defective AtSWEET1 inhibits glucose  
627 transport activity<sup>34,35</sup>. In another study, the oligomerization of functional OsSWEET11  
628 with the mutated form of OsSWEET11 inhibited the sugar transport activity and  
629 restricted *Rhizoctonia solani* infection in rice<sup>21</sup>. Biochemical studies have indicated  
630 that the heterooligomerization of the sucrose transporters SUT1 and SUT2 ceases  
631 sucrose transport<sup>36</sup>. Moreover, AtSWEET12 and AtSWEET11 co-interact with each  
632 other (Fig. 9 and Supplementary Figs. 20–22) and have been reported to form a  
633 heterooligomer<sup>6,34</sup>. Our data provide evidence that the coexpression of AtSWEET12  
634 with AtSWEET11 in yeast cells inhibited sucrose uptake activity (Fig. 8). This might  
635 be one of the predictable mechanisms for AtSWEET12-mediated regulation of  
636 AtSWEET11 through which sucrose levels can be controlled in the apoplast during



Fig. 9

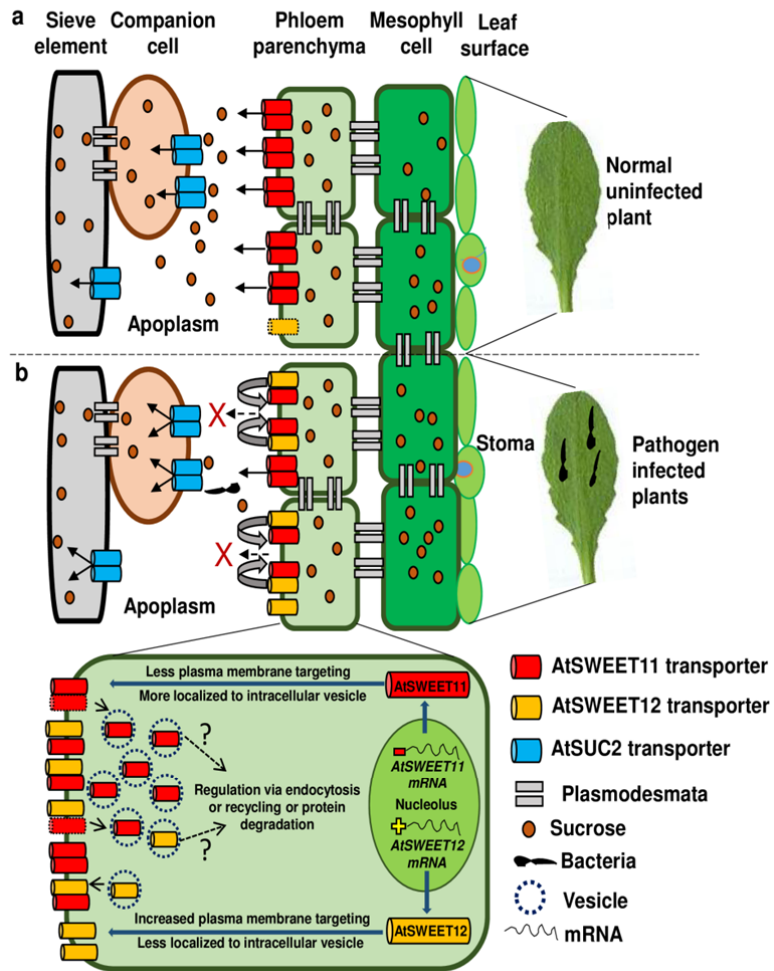

**Fig. 9 Model depicting the regulation of apoplastic sucrose levels by AtSWEET12 transporter during plant defense.**

**a** Under normal conditions, AtSWEET11 is actively involved in sucrose efflux into the apoplast during the phloem loading process. **b** After bacterial infection, plant reduces the expression of *AtSWEET11* gene and the abundance of the AtSWEET11 transporter at the plasma membrane. Meanwhile, the plant induces *AtSWEET12* expression and increases the targeting of the AtSWEET12 transporter to the plasma membrane. AtSWEET12 co-interacts and heterooligomerizes with AtSWEET11 that inhibits the transport of sucrose. We speculate that the oligomerization of AtSWEET12 with AtSWEET11 might be one of the regulatory mechanisms through which AtSWEET11-mediated sucrose efflux could be controlled by AtSWEET12, thereby limiting sucrose availability to bacterial pathogens in the apoplast and, thereby leading to the pathogen starvation. Moreover, we propose that plants regulate the localization and abundance of the AtSWEET11 and AtSWEET12 transporters at the plasma membrane by constant endocytosis, recycling, and protein degradation.



638 AtSWEET11 may hinder the transport activity because structural incompatibility  
639 prevents the formation of a functional pore for sucrose transport.

640

641 Various studies lead us to state that the plant defense strategy of apoplastic sucrose  
642 limitation to bacterial pathogens might involve the highly coordinated regulation of  
643 AtSWEET11 and AtSWEET12, and the sugar uptake transporters AtSUC2 to restrict  
644 bacterial pathogen multiplication<sup>6,8,13</sup>. On the basis of our findings, we propose that  
645 under normal conditions, AtSWEET11 is involved in sucrose efflux into the apoplast.  
646 During bacterial infection, plant induces *AtSWEET12* and reduces *AtSWEET11*  
647 expression after PAMP perception, and promotes the plasma membrane targeting of  
648 AtSWEET12 protein. The AtSWEET12 heterooligomerize with AtSWEET11 which  
649 inhibit the sucrose transport, thereby limiting sucrose availability to the pathogen in  
650 the apoplast and restricting its multiplication (Fig. 9). Besides, phosphorylation and  
651 ubiquitination might be involved in the activation and deactivation of these  
652 transporters<sup>13,37,38</sup>. The interaction of AtFLS2 with AtSWEET11 or AtSWEET12 could  
653 be directly involved in mediating the post translational regulation of these  
654 transporters. In the road ahead, more focused studies exploring the mechanisms  
655 involved in the regulation of AtSWEET11 and AtSWEET12 will provide clearer  
656 insights into this aspect as a basis of plant defense. Taken together, our findings  
657 clearly showed a plant defense strategy against bacterial pathogens involving the  
658 PAMP-mediated regulation of AtSWEET11 and AtSWEET12. Our findings highlight a  
659 role of AtSWEET12 in controlling apoplastic sucrose levels, thereby restricting  
660 bacterial multiplication in the apoplast. Moreover, along with other active plant  
661 defense mechanisms, the regulation of apoplastic sugar availability to pathogens at  
662 the site of infection by manipulating such sugar transporters can be an effective  
663 strategy for crop protection.

664

## 665 **MATERIALS AND METHODS**

666

### 667 **Plant material and growth conditions**

668

669 *Arabidopsis thaliana* wild-type Columbia-0 (Col-0); T-DNA mutants of all 17  
670 *AtSWEET* genes (*atsweet1* to *atsweet17*) (described in Supplementary Table 2;  
671 more details regarding genotyping and null mutation analysis are presented in

672 Supplementary Materials and Methods, Supplementary Figs. 27 and 28, and  
673 Supplementary Tables 2 and 3); *atsweet11;12*, *atsweet11;15*, *atsweet12;15*,  
674 *atsweet11;12;15* mutant lines<sup>17</sup>, and complementation lines of AtSWEET11 (c-  
675 11/11;12) and AtSWEET12 (c-12/11;12) in the *atsweet11;12* double mutant  
676 background<sup>6</sup>; *pAtSWEET11:AtSWEET11-GUS* and *pAtSWEET12:AtSWEET12-GUS*  
677 lines<sup>6</sup>; and *p35S:AtSWEET12-eYFP* (overexpression line) were obtained from the  
678 Arabidopsis Biological Resource Centre (ABRC) (<https://abrc.osu.edu/>). For seedling  
679 germination and growth, Arabidopsis seeds were sown in a soil mixture of 3:1 vol/vol  
680 agropeat (Prakruthi Agro Tech, Bangalore, India) and vermiculite (Keltech Energies  
681 Ltd., Bangalore, India) and then cold treated for 3 days at 4 °C in the dark.  
682 Arabidopsis plants were grown in a growth chamber (PGR15; Conviron, Winnipeg,  
683 Canada) under 8 h light (light intensity, 200  $\mu\text{E m}^{-2} \text{s}^{-1}$ )/16 h dark at 20 °C and 75%  
684 relative humidity. Plants were irrigated alternately with water and 1/2X Hoagland  
685 nutrient solution (Cat# TS1094; HiMedia Laboratories, Mumbai, India) every day.

686

#### 687 **Bacterial pathogens and inoculum preparation**

688

689 The bacterial pathogens used in this study were as follows: a host pathogen of  
690 Arabidopsis, *Pst* DC3000; nonhost pathogens of Arabidopsis, *Psp* and *Pta*; T3SS  
691 mutants (*hrcC*<sup>-</sup>) of all these three bacterial pathogens; and avirulent strains of *Pst*  
692 DC3000, i.e., *avrRpt2*, *avrRps4*, and *avrRpm1*. All the bacterial strains were grown at  
693 28 °C with continuous shaking at 150 rpm in King's B (KB) medium (liquid) (Cat#  
694 M1544; HiMedia Laboratories) containing appropriate antibiotics. Rifampicin at 50  
695  $\mu\text{g/mL}$  was added to the medium for growing *Pst* DC3000 and *Psp*. Bacterial cultures  
696 were grown overnight (12 h) to obtain an optical density of 0.4 at 600 nm ( $\text{OD}_{600} =$   
697 0.4). Bacterial cells were collected by centrifugation at 4,270  $\times g$  for 10 min, washed  
698 thrice in sterile water, and re-suspended in sterile water at desired concentrations.  
699 The concentrations used for the inoculation of the leaves (32-day-old plants) were  
700  $5 \times 10^5$  colony-forming units (CFU)/mL for *Pst* DC3000,  $1 \times 10^6$  CFU/mL for *Psp*,  $3 \times$   
701  $10^5$  CFU/mL for *Pta*, and  $1 \times 10^6$  CFU/mL for the *hrcC*<sup>-</sup> T3SS mutants of *Pst* DC3000  
702 and *Pta*.

703

#### 704 **Plant inoculation, *in planta* bacterial multiplication assay, and disease index** 705 **analysis**

706

707 Thirty-two-day-old plants were used for inoculation experiments. The bacterial  
708 suspension was syringe-infiltrated on the abaxial surface of fully expanded leaves  
709 using a needleless syringe. Each plant (all leaves) was inoculated with 5 mL of  
710 bacterial suspension. Sterile water-infiltrated plants were used as mock plants. For  
711 the estimation of bacterial multiplication after *in planta* sucrose addition, the bacterial  
712 pathogen was co-infiltrated with sucrose at a low concentration of 0.2% (2 mg/mL)  
713 and a high concentration of 1% (10 mg/mL). The inoculated plants were maintained  
714 in a growth chamber at 20 °C. Leaf samples were collected at 0, 1, 2, and 3 dpi for  
715 bacterial multiplication analysis. *In planta* bacterial multiplication levels were  
716 quantified by homogenizing leaf discs (0.5 cm<sup>2</sup> each) in sterile water, after which the  
717 appropriate dilution was plated on KB agar medium. Bacterial numbers were counted  
718 as CFUs per square centimeter of leaf area and expressed as log<sub>10</sub> values<sup>39</sup>.  
719 Experiments were carried out with at least six plants per treatment as biological  
720 replicates, and two leaves from each plant were taken as technical replicates.  
721 Bacterial multiplication numbers were calculated by using the following formula:

722

$$723 \text{ Bacterial number (CFU/cm}^2\text{)} = \frac{\text{Number of colonies} \times \text{volume of homogenate } (\mu\text{L)} \times \text{dilution factor}}{\frac{\text{volume plated}}{\text{Leaf area (cm}^2\text{)}}} \text{ (Eq. 1).}$$

724

725 Log<sub>10</sub> values are presented in the graphs. The disease index after host pathogen  
726 infection was established by scoring the chlorotic and necrotic disease symptoms in  
727 plants at 3 dpi. Five different plants were used as biological replicates for scoring the  
728 disease symptoms. Photographs were taken at 3 dpi.

729

730

731

### 732 **Green and yellow fluorescence detection by confocal microscopy**

733

734 The imaging of *in planta* bacterial populations of *Pst* DC3000 and *Pta* carrying the  
735 pDSK-GFPuv plasmid<sup>39</sup> was done at the cellular level using a confocal microscope  
736 (Leica TCS SP8 AOBS system; Leica Microsystems, Wetzlar, Germany). A small  
737 piece of leaf from 32-day-old *Arabidopsis* wild-type and mutant plants inoculated with  
738 GFPuv-labeled bacteria was kept on a glass slide. The leaf tissue was submerged

739 with a droplet of deionized water and covered with a glass cover slip. The images  
740 were taken with a water immersion objective of 63X using excitation at 488 nm and  
741 emission between 500 and 600 nm. Similarly, localization of AtSWEET12-YFP in  
742 Arabidopsis leaves was performed using the same instrument after excitation at 514  
743 nm, and the fluorescence YFP signal was recorded between 525 and 560 nm.

744

#### 745 **GUS histochemical staining and microscopic analysis**

746

747 Histochemical GUS staining was performed by following the standard protocol as  
748 explained by Jefferson et al.<sup>40</sup>(1987). Leaf samples were harvested after pathogen  
749 inoculation and mock treatment at 0, 36, and 48 hpi. The leaf tissues were pre-  
750 incubated in 90% (v/v) ice-cold acetone for 10 min and then washed thrice with 100  
751 mM phosphate buffer solution (pH 7.2) for 5 min. Leaf tissues were then incubated at  
752 37 °C for 8 h in a GUS staining solution containing 1 mM of 5-bromo-4-chloro-3-  
753 indolyl- $\beta$ -glucuronic acid, cyclohexylammonium salt monohydrate (X-Gluc) (Cat# B-  
754 7300; Biosynth AG, Staad, Switzerland), 100 mM sodium phosphate (pH 7.0), 1 mM  
755 potassium ferrocyanide, 1 mM potassium ferricyanide, and 0.1% (v/v) Triton X-100  
756 (Cat# MB031; HiMedia Laboratories). Gradient alcohol treatment was performed for  
757 de-staining the leaf tissue samples. The leaf samples were first immersed in 90%  
758 alcohol for 4 h, followed by 70% alcohol for 12 h, 50% alcohol for 24 h, and 30%  
759 alcohol for 48 h. The GUS-stained samples were observed under a Strereozoom  
760 AZ100 Microscope (Nikon Instruments Inc., Melville, NY, USA) mounted with a  
761 digital camera (Nikon Digital Sight DS-Rs1; Nikon Instruments Inc.) for capturing the  
762 images. Fiji software (<http://fiji.sc>) was used for image analysis. ImageJ software  
763 (<http://imagej.nih.gov/ij/>) was used for measuring the intensity of the images.

764

765

#### 766 **Apoplastic fluid extraction**

767

768 Apoplastic fluid was extracted from control and pathogen-infected Arabidopsis plants  
769 according to the standard protocol detailed by O'Leary et al.<sup>41</sup>(2014), with minor  
770 modifications. Arabidopsis leaves were detached and rinsed in distilled water to  
771 remove surface contamination. Leaf weight was measured before infiltration, after  
772 which leaves were immersed in a beaker containing 250 mL sterile MilliQ water.

773 Vacuum was applied to infiltrate sterile water into the apoplastic space till complete  
774 saturation. The leaves were blotted dry, weighed, and placed in 4-inch-wide Parafilm  
775 strips and gently rolled up. The rolled-up leaves were inserted into a 20 mL syringe,  
776 and this setup was further placed into a 50 mL centrifuge tube for spinning.  
777 Apoplastic fluid extracted by centrifugation at 1,000  $\times g$  for 30 min at 4 °C was  
778 transferred into 1.5 mL tubes and centrifuged at 15,000  $\times g$  for 5 min to remove  
779 particulate materials. The apoplastic fluid was then filter-sterilized through 0.22  $\mu m$   
780 filters to remove any microbial contamination. No cytoplasmic contamination was  
781 detected in the apoplastic samples (detailed information is presented in  
782 Supplementary Materials and Methods and Supplementary Fig. 29). Samples were  
783 then used for further analysis or stored at  $-80$  °C.

784

### 785 **GC-MS metabolite analysis**

786

787 Metabolite profiling of apoplastic fluid obtained from infected and control plants was  
788 done by following the standard protocol of Lisec et al.<sup>42</sup> (2006) with minor changes.  
789 Apoplastic fluid samples (500  $\mu L$ ) were transferred into 2 mL tubes, and the samples  
790 were lyophilized in a freeze drier overnight. A calculated amount of distilled water  
791 was added to reconstitute the apoplastic sample. Next, 200  $\mu L$  apoplastic sample  
792 was transferred to 1.5 mL tubes, and 700  $\mu L$  methanol with 15  $\mu g/mL$  adonitol (Cat#  
793 02240; Sigma-Aldrich, St. Louis, USA) as the internal standard was added, followed  
794 by incubation at 70 °C for 10 min. Then, samples were centrifuged at 11,000  $\times g$  for  
795 10 min, and 700  $\mu L$  of supernatant was transferred to fresh 1.5 mL tubes. Ice-cold  
796 chloroform (375  $\mu L$ ) and molecular-grade water (500  $\mu L$ ) were added to the  
797 supernatant, and the mixture was vortexed and centrifuged at 2,200  $\times g$  for 15 min.  
798 Then, 150  $\mu L$  of the upper aqueous layer was transferred to 4 mL glass vials and  
799 dried completely by vacuum centrifugation at room temperature. The methoximation  
800 of dried samples was done by adding 40  $\mu L$  pyridine (Cat# 270407; Sigma-Aldrich)  
801 with 20 mg/mL methoxyamine hydrochloride (Cat# 89803; Sigma-Aldrich) and  
802 incubating at 70 °C for 2 h with vigorous shaking. The sample was then derivatized  
803 by adding 60  $\mu L$  *N*-methyl-*N*-(trimethylsilyl)trifluoro acetamide (MSTFA) (Cat# 69479;  
804 Sigma-Aldrich) and incubating for 30 min at 37 °C. Two microliters of sample was  
805 used for analysis by an autosampler-autoinjector (AOC-20si) coupled with a gas  
806 chromatograph-mass spectrometer (Shimadzu QP2010 Ultra, Kyoto, Japan).

807 Analyses of chromatograms and mass spectra were performed by GCMS solution  
808 software (Shimadzu). The peaks were identified as metabolites using spectral  
809 libraries, i.e., NIST8 and WILEY8. The peak area for each metabolite was  
810 normalized using adonitol as the internal control.

811

### 812 **Estimation of sugar content**

813

814 Five hundred microliters of apoplastic fluid was transferred into 2 mL tubes, and the  
815 samples were lyophilized in a freeze drier overnight. The apoplastic fluid sample was  
816 reconstituted with distilled water. Next, 200  $\mu$ L of concentrated apoplastic sample  
817 was transferred to 1.5 mL tubes. Soluble sugars were extracted by adding 500  $\mu$ L of  
818 80% ethanol at 80 °C for 10 min. Samples were centrifuged at 11,000  $\times g$  for 10 min,  
819 and 300  $\mu$ L of supernatant was transferred to fresh 1.5 mL tubes. Sucrose, D-  
820 fructose, and D-glucose concentrations were determined from the apoplastic  
821 samples by using a Sucrose/D-Glucose/D-Fructose Megazyme Kit following the  
822 manufacturer's instructions (K-SUFRG; Megazyme International, Ireland Ltd.,  
823 Wicklow, Ireland). Sugars were quantified by reading the samples at 340 nm using a  
824 spectrophotometer.

825

### 826 ***In vitro* bacterial quantification**

827

828 *Pst* DC3000, *Psp*, and *Pta* were grown in KB medium overnight (12 h) till the initial  
829 optical density reached  $OD_{600} = 0.4$ . Bacterial cells were harvested by centrifugation  
830 at 5,488  $\times g$  for 10 min. Pellets containing bacterial cells were washed twice with  
831 sterile water and re-suspended in sterile water. Bacterial suspensions were  
832 inoculated in MM (pH 7.4) supplemented with 5% (v/v) apoplastic extracts from  
833 mutants and wild-type plants individually, such that the  $OD_{600}$  at the 0 h time point  
834 was maintained at 0.1. The samples were then grown at 28 °C with continuous  
835 shaking at 150 rpm. Bacterial quantification was performed at 0, 8, 10, and 12 h by  
836 measuring the  $OD_{600}$  for each sample.

837

### 838 **RT-qPCR analysis**

839

840 The bacterial cells were harvested, and the total RNA was extracted using TriZol  
841 reagent (Cat# 15596018, Invitrogen, Carlsbad, CA, USA) as per the manufacturer's  
842 protocol. RNA quantification was done using a NanoDrop spectrophotometer (ND-  
843 1000; Thermo Fisher, Waltham, MA, USA). RNA (5 µg) was treated with DNase.  
844 First-strand cDNA synthesis was done using DNase-treated RNA in a reaction  
845 volume of 50 µL by a Verso cDNA synthesis kit (Cat# AB1453A, Thermo Scientific)  
846 following the manufacturer's protocol. The gene-specific primers, including the  
847 primers for the reference gene *16S rRNA* (Psp: PSPPH\_0689; Pst DC3000:  
848 PSPTOr01), were designed using Primer 3 software ([http://bioinfo.ut.ee/primer3-](http://bioinfo.ut.ee/primer3-0.4.0/)  
849 [0.4.0/](http://bioinfo.ut.ee/primer3-0.4.0/)). Details of the primers used in the study are listed in Supplementary Table  
850 S3<sup>43</sup>. For real-time quantitative PCR (RT-qPCR), a 10 µL final volume was prepared  
851 by adding 1 µL of five-fold diluted cDNA, gene-specific primers at 750 nM each, and  
852 HotStart-IT SYBR Green qPCR Master Mix (Cat# 600882, Agilent Technologies,  
853 Santa Clara, CA, USA) as per the manufacturer's protocol. RT-qPCR was performed  
854 according to the manufacturer's instructions on an ABI 7900HT PCR system  
855 (Applied Biosystems, Foster City, CA, USA). The cycle threshold (Ct) values for *16S*  
856 *rRNA* expression were used to normalize the expression values of target genes in  
857 each sample. The relative expression values for each sample were determined over  
858 their respective control using the comparative  $2^{-\Delta\Delta Ct}$  method<sup>44</sup>. Three independent  
859 biological replicates were used for all RT-qPCR analyses.

860

### 861 **Yeast growth assay**

862

863 Cells from single colonies of the transformed yeast strain SUSY7/ura3<sup>45</sup> were grown  
864 overnight at 30 °C. A portion of this was re-inoculated into fresh synthetic deficient  
865 (SD) medium with 2% glucose until the cell densities reached an OD<sub>600</sub> of 0.8–1.0.  
866 Cells were then harvested by centrifugation at 4,270 ×g for 10 min, washed twice,  
867 and then diluted with SD medium (without any carbon source) to an OD<sub>600</sub> of 0.2.  
868 Next, the appropriate serial dilutions of all desired yeast cells were prepared (10<sup>-1</sup>,  
869 10<sup>-2</sup>, 10<sup>-3</sup>, 10<sup>-4</sup>), and from every dilution, 5 µL was spotted on the plates containing  
870 SD medium supplemented with 2% glucose or 2% sucrose. Plates were kept for  
871 incubation at 30 °C for 4 days and then scanned and photographed (detailed  
872 information about constructs is presented in Supplementary Materials and Methods).  
873



## 874 **Radiotracer sucrose uptake assay in yeast**

875

876 Cultures of transformed SUSY7/ura3 yeast cells were grown overnight at 30 °C. A  
877 portion of this culture was diluted to an OD<sub>600</sub> of 0.2 with fresh SD medium  
878 supplemented with 2% glucose and kept for 4 h incubation at 30 °C until the cell  
879 densities reached an OD<sub>600</sub> of 0.5. Cells were collected by centrifugation, washed  
880 twice, and then re-suspended into 50 mM sodium phosphate buffer (pH 5.5) to an  
881 OD<sub>600</sub> of 10. The concentration-dependent sucrose uptake assay was performed as  
882 described by Sauer and Stadler<sup>46</sup>(1993) and Ho et al.<sup>47</sup>(2019). The uptake buffers  
883 were prepared with desired sucrose concentrations in 50 mM sodium phosphate  
884 buffer with equimolar ratio of [<sup>14</sup>C]-radiolabeled sucrose. The uptake assay was  
885 initiated by adding equal volume of transformed yeast cells into 150 µL of uptake  
886 buffers and then incubated at 30 °C for 10 min. Yeast cells were collected by  
887 vacuum filtration on MCE membrane filter paper (pore size, 0.45 µm) and then  
888 washed thrice with 5 mL of ice-cold 50 mM sodium phosphate buffer. The filter paper  
889 containing cells was kept in 5 mL of counting fluor (Sigma) in scintillation vials.  
890 Radioactivity was quantified by a liquid scintillation counter (Perkin Elmer Inc., USA),  
891 and kinetic analysis for nonlinear regression was performed using SigmaPlot  
892 (version 14; Systat Software Inc., Chicago, IL, USA).

893

894

## 895 **Statistical analysis**

896

897 The error bars presented in the figures represent the standard error of the mean  
898 (SEM) of all the replicates used in the study. The figure legends state the total  
899 number of biological replicates used in every experiment. For statistical analysis of  
900 data represented in the figures, two-way and one-way analyses of variance  
901 (ANOVA), along with Tukey's post-test comparison ( $P < 0.05$ ), were performed using  
902 SigmaPlot (version 14.0). Student's *t*-test at  $P < 0.05$  was performed to determine  
903 significant differences from the wild type. The raw data containing the details of the  
904 total number of biological replicates and SEM values are presented in  
905 Supplementary File 1.

906

## 907 **Data availability**

908

909 All data related to this study are available within the manuscript and its  
910 supplementary files or are available from the corresponding author upon reasonable  
911 request. The raw data containing the details for figures and supplementary figures  
912 are provided in Supplementary File 1.

913

914

### 915 **Accession Numbers**

916 For this article, the sequence data can be retrieved from the Arabidopsis Genome  
917 Initiative or GenBank/EMBL databases under the following accession numbers:

918 *SWEET1: AT1G21460, SWEET2: AT3G14770, SWEET3: AT5G53190, SWEET4:*  
919 *AT3G28007, SWEET5: AT5G62850, SWEET6: AT1G66770, SWEET7: AT4G10850,*  
920 *SWEET8: AT5G40260, SWEET9: AT2G39060, SWEET10: AT5G50790, SWEET11:*  
921 *AT3G48740, SWEET12: AT5G23660, SWEET13: AT5G50800, SWEET14*  
922 *AT4G25010, SWEET15: AT5G13170, SWEET16: AT3G16690, SWEET17:*  
923 *AT4G15920, SID2: AT1G74710, PR1: AT2G14610, PR5: AT1G75040, EDS1:*  
924 *AT3G48090, scrY: PSPPH5187, PSPTO0890.*

925

### 926 **Acknowledgements**

927

928 We thank Dr. W.B. Frommer and the Arabidopsis Biological Resource Center for  
929 providing seeds for transgenic plants. We acknowledge Drs. John Ward and Divya  
930 Chandran and for sharing yeast strains. We thank Ms. Nishtha Rawat and Ms. Anjali  
931 for technical help during experiments. We thank Mr. Rahim Tarafdar and Sundar  
932 Solanki for providing technical help at the laboratory and Dr. Aashish Ranjan, Dr.  
933 Senjuti Sinharoy, Dr. Mahesh Patil, Dr. Bendangchuchang Longchar, Dr. Piyush  
934 Priya, and Aanchal Choudhary for critical reading of the manuscript. We  
935 acknowledge the DBT-eLibrary Consortium (DeLCON) and NIPGR library for  
936 providing access to e-resources and the NIPGR Plant Growth Facility for plant  
937 growth support/space. The project at MS-K's laboratory was funded by NIPGR. UF  
938 acknowledges the DBT-SRF fellowship (DBT/2013/NIPGR/68) and NIPGR-SRF  
939 fellowship.

940

### 941 **Author contributions**

942 MS-K conceived the idea. MS-K and UF designed the study. UF executed the  
943 experiments, analyzed the data, and contributed to drafting the manuscript. MS-K  
944 and UF edited the manuscript.

#### 945 **Competing interests**

946 The authors declare that no potential conflict of interest exists.

#### 947 **Figure legends**

948

#### 949 **Fig. 1 Mutant screening for the identification of AtSWEET transporters** 950 **involved in plant defense.**

951 **a** and **b** The leaves of 32-day-old Arabidopsis wild-type (Col-0) and *atsweet1* to  
952 *atsweet17* mutant plants were inoculated with **(a)** the nonhost pathogen  
953 *Pseudomonas syringae* pv. *phaseolicola* (*Psp*) at  $1 \times 10^6$  CFU/mL and **(b)** the host  
954 pathogen *P. syringae* pv. *tomato* DC3000 (*Pst* DC3000) at  $5 \times 10^5$  CFU/mL.  
955 Bacterial multiplication assays were performed, and the bacterial populations were  
956 monitored by plating serial dilutions of leaf extracts at 0, 1, 2, and 3 days post  
957 inoculation (dpi). *In planta* bacterial number was expressed as  $\log_{10}$  values.  
958 Significant differences ( $P < 0.05$ ) after applying one-way ANOVA and Tukey's  
959 correction are indicated by different letters. Data were obtained from the mean of six  
960 biological replicates and two technical replicates. Error bars show the standard error  
961 of the mean (SEM) (see Supplementary Dataset S1 for raw data and statistics). The  
962 experiment was repeated twice, and consistent results were observed.

963

#### 964 **Fig. 2 The sugar transporter AtSWEET12 is involved in plant defense.**

965 **a** and **b** The leaves of 32-day-old Arabidopsis wild-type (Col-0); *atsweet11;12*,  
966 *atsweet11;15*, and *atsweet12;15* double mutants; and *atsweet11;12;15* triple  
967 mutants were inoculated with **(a)** the nonhost pathogen *Psp* at  $1 \times 10^6$  CFU/mL and  
968 **(b)** the host pathogen *Pst* DC3000 at  $5 \times 10^5$  CFU/mL. Bacterial populations were  
969 monitored by plating serial dilutions of leaf extracts at 0, 1, 2, and 3 days post  
970 inoculation (dpi).

971 **c** Phenotypes of plants inoculated with the *Psp* and *Pst* DC3000. Water-inoculated  
972 plants (mock treatment) were used for comparison with pathogen-inoculated plants.  
973 Photographs were taken at 3 dpi. **d** Disease scoring was done for host pathogen-

974 infected plants at 3 dpi. Scores were given on the basis of symptom development as  
975 follows, score 0: no symptoms, score 1: leaf margins showing chlorosis, score 2:  
976 midrib region of leaf showing chlorosis, score 3: two-thirds of leaf area showing  
977 chlorosis, score 4: full leaf showing chlorosis, score 5: leaf showing necrosis.  
978 Asterisks indicate a significant difference from the wild-type (Student's *t*-test; \**P* <  
979 0.01). Data were obtained from the mean of three biological replicates, and error  
980 bars show the SEM. **e** and **f** Thirty-two-day-old *Arabidopsis* wild-type (Col-0) and  
981 complementation lines c-11/11;12 and c-12/11;12 transformed with p-  
982 AtSWEET11:AtSWEET11 and pAtSWEET12:AtSWEET12, respectively, in the  
983 *atsweet11;12* double mutant background were syringe inoculated with (**e**) *Psp* at  $1 \times$   
984  $10^6$  CFU/mL and (**f**) *Pst* DC3000 at  $5 \times 10^5$  CFU/mL. Bacterial populations were  
985 monitored by plating serial dilutions of the leaf extract at 0, 1, 2, and 3 dpi. For a, b, e  
986 and f *in planta* bacterial number was expressed as  $\log_{10}$  values. **g** The *in planta*  
987 bacterial populations of green fluorescent protein (GFP)-labeled host pathogen *Pst*  
988 DC3000 and nonhost pathogen *P. syringae* pv. *tabaci* (*Pta*) were determined in the  
989 wild-type (Col-0), *atsweet11*, *atsweet12*, and *atsweet11;12* mutant plants. The  
990 leaves of 32-day-old *Arabidopsis* wild-type, *atsweet11*, *atsweet12*, and *atsweet11;12*  
991 mutant plants were inoculated with the *Pst* DC3000 expressing *GFPuv* at  $5 \times 10^5$   
992 CFU/mL and *Pta* expressing *GFPuv* at  $3 \times 10^5$  CFU/mL. The population of  
993 fluorescent bacteria was monitored at 2 dpi by observing the leaf using a Leica TCS  
994 SP8 confocal microscope (excitation at 488 nm and emission between 500 and 600  
995 nm). The images were taken using a 63X objective and merged together by Leica  
996 microsystems LAS AF confocal software. The GFP fluorescence signals were  
997 quantified by ImageJ software (<http://imagej.nih.gov/ij/>). The intensity values were  
998 calculated and presented at the bottom of the image. The intensity was depicted as  
999  $\log_{10}$  values. For **a**, **b**, **e**, and **f**, significant differences (*P* < 0.05) after applying two-  
1000 way ANOVA and Tukey's correction are indicated by different letters. Data were  
1001 obtained from the mean of six biological replicates and two technical replicates. Error  
1002 bars show the SEM. The experiment was repeated thrice, and consistent results  
1003 were observed.

1004

1005 **Fig. 3 Apoplastic sucrose levels in mutant and wild-type plants impact the *in***  
1006 ***vitro* bacterial multiplication and sucrose utilization by bacteria.**

1007 **a** The absolute level of apoplastic sucrose was measured by a sugar quantification  
1008 kit. **b** The estimation of specific luminescence intensities of sucrose biosensors from  
1009 *R. leguminosarum* grown in the apoplast obtained from *atsweet11*, *atsweet12*,  
1010 *atsweet11;12* and wild-type (Col-0) plants. Bacteria were inoculated in the apoplast  
1011 extracts such that the OD<sub>600</sub> at 0 hour time point was maintained at 0.1 (OD<sub>600</sub> = 0.1).  
1012 Bacterial cultures were incubated at 28 °C, and relative luminescence (expressed as  
1013 RLU) and OD<sub>600</sub> was measured at 0 and 4 hpi. The specific luminescence intensity  
1014 was calculated as RLU/ OD<sub>600</sub>. The 10mM sucrose was used as a positive control. **c**  
1015 and **d** *In vitro* quantification of **(c)** *Psp* and **(d)** *Pst* DC3000 multiplication in apoplast  
1016 extract of *atsweet11*, *atsweet12*, *atsweet11;12* and wild-type (Col-0). The apoplast  
1017 was extracted from 32-day-old mutant and wild-type plants by the vacuum-infiltration  
1018 and centrifugation method. Bacteria were inoculated in minimal medium M9 (MM)  
1019 supplemented with 5 % apoplast extracts such that the OD<sub>600</sub> at 0 hour time point  
1020 was maintained at 0.1 (OD<sub>600</sub> = 0.1). Bacterial cultures were incubated at 28 °C, and  
1021 OD<sub>600</sub> was measured at 0, 8, 10, and 12 hpi. **(e)** and **(f)** The transcript levels of the  
1022 *scrY* gene (gene ID: *Psp*, PSPPH5187; *Pst* DC3000; PSPTO0890) were studied in  
1023 **(e)** *Psp* and **(f)** *Pst* DC3000 grown *in vitro* in MM supplemented with apoplast extract  
1024 of *atsweet11*, *atsweet12*, *atsweet11;12*, and wild-type (Col-0), and sucrose (50 mM).  
1025 The bacteria were inoculated in MM supplemented with 5 % apoplast extracts and  
1026 sucrose at 50 mM concentration (OD<sub>600</sub> = 0.1 at 0 hpi). The bacterial culture was  
1027 incubated at 28 °C. The bacterial cells were harvested at 10 hpi and bacterial RNA  
1028 was isolated. The relative transcript levels were measured by RT-qPCR. The  
1029 expression values were normalized against the reference gene, *16S rRNA* (*Psp*:  
1030 PSPPH\_0689; *Pst* DC3000: PSPTOr01), and the relative expression levels (RQ)  
1031 were obtained over bacteria grown in Col-0 apoplast. Bars represent the transcript  
1032 expression pattern of genes. In **a**, **b**, **e** and **f**, significant difference ( $P < 0.05$ ) after  
1033 applying one-way ANOVA and Tukey's correction are indicated by different letters.  
1034 For **a**, **e** and **f** data were obtained from the mean of three biological replicates ( $n =$   
1035 3), and error bars show the SEM. The experiment was repeated twice, and  
1036 consistent results were observed. For **b**, data were obtained from the mean of seven  
1037 biological replicates ( $n = 7$ ) and two technical replicates, and error bars show the  
1038 SEM. The experiment was repeated thrice, and consistent results were observed. In  
1039 **c** and **d** significant differences ( $P < 0.05$ ) after applying two-way ANOVA and  
1040 Tukey's correction are indicated by different letters. The mean of five biological

1041 replicates (n = 5) was obtained, and error bars show the SEM. The experiment was  
1042 performed thrice, with consistent results.

1043

1044 **Fig. 4 Sucrose is the limiting factor responsible for restricting the nonhost**  
1045 **pathogen multiplication in the apoplast**

1046 **a** The apoplastic sucrose levels after host and nonhost pathogen infection in wild-  
1047 type, *atsweet11* and *atsweet12* mutant plants over their respective mock-treated  
1048 plants are presented. The 32-d-old Arabidopsis *atsweet11*, *atsweet12* mutant and  
1049 wild-type plants were inoculated with sterile water as mock, host pathogen *Pst*  
1050 DC3000 at  $5 \times 10^5$  CFU/mL, and nonhost pathogen, *Psp* at  $1 \times 10^6$  CFU/mL.  
1051 Samples were harvested at 24 hpi. The apoplastic fluids from wild-type and mutant  
1052 plants were obtained by vacuum infiltration and centrifugation method. The sucrose  
1053 levels was estimated by using gas chromatography-mass spectrometry (GC-MS).  
1054 The relative abundance of sugars were estimated by using ribitol as an internal  
1055 standard. **b** The absolute sucrose content was measured in the apoplast obtained  
1056 from *atsweet12* mutant plants inoculated with sterile water as mock and *Psp* at  $1 \times$   
1057  $10^6$  CFU/mL at 24 hpi by sugar estimation kit. **a, b** Asterisks indicate a significance  
1058 difference from respective mock-treated plants (student's *t* test; \**P* < 0.05). Data  
1059 were obtained from the mean of total three biological replicates (n=3) and error bars  
1060 show  $\pm$  standard error of mean. The experiment was repeated twice and consistent  
1061 results were observed. **c** *In vitro* quantification of *Psp* multiplication was done in the  
1062 apoplast extract obtained at 8 h after infection with *Psp* and sterile water in  
1063 *atsweet11*, *atsweet12*, *atsweet11;12*, and wild-type (Col-0) plants. The apoplastic  
1064 extracts were isolated by the vacuum-infiltration and centrifugation method. Bacteria  
1065 were inoculated in MM supplemented with 5 % apoplast extracts ( $OD_{600} = 0.1$  at 0  
1066 hpi). The bacterial culture was incubated at 28 °C, and  $OD_{600}$  was measured at 0, 8,  
1067 10 and 12 hpi. **d** *In vitro* quantification of *Psp* multiplication in the apoplast extract of  
1068 *atsweet11* and wild-type (Col-0) plants after 1 % sucrose addition in the apoplast.  
1069 The apoplast was extracted from 32-day-old mutant and wild-type (Col-0) plants by  
1070 vacuum-infiltration and centrifugation. **e** *In vitro* quantification of *Psp* multiplication  
1071 after sucrose addition in the apoplast extract obtained 8 hpi with *Psp* and sterile  
1072 water (used as the mock treatment) in *atsweet11*, *atsweet12*, and wild-type (Col-0)  
1073 plants. The apoplast was extracted from *Psp* and mock-treated mutant and wild-type  
1074 (Col-0) plants by vacuum-infiltration and centrifugation. *Psp* was inoculated in MM



1075 supplemented with 5 % apoplast extract and 1 % sucrose ( $OD_{600} = 0.1$  at 0 hpi).  
1076 Bacterial cultures were incubated at 28 °C, and  $OD_{600}$  was measured at 0, 8, 10, and  
1077 12 hpi. For **c**, **d** and **e** significant differences ( $P < 0.05$ ) after applying two-way  
1078 ANOVA and Tukey's correction are indicated by different letters. Data were obtained  
1079 from the mean of five biological replicates ( $n = 5$ ), and error bars show the SEM. The  
1080 experiment was repeated thrice, and consistent results were observed.

1081

1082

1083 **Fig. 5 Pathogen multiplication in mutants is reverted to wild-type levels upon**  
1084 ***in planta* sucrose addition.**

1085 **a** *In planta* bacterial multiplication was estimated in 32-day-old *Arabidopsis*  
1086 *atsweet11*, *atsweet12*, and *atsweet11;12* mutants and wild-type plants inoculated  
1087 with the nonhost pathogen *Psp* alone, co-inoculated with *Psp* and 0.2 % sucrose,  
1088 and co-inoculated with *Psp* and 1 % sucrose. **b** *In planta* bacterial multiplication was  
1089 estimated in 32-day-old *atsweet11*, *atsweet12*, and *atsweet11;12* mutants and wild-  
1090 type plants inoculated with the host pathogen *Pst* DC3000 alone, co-inoculated with  
1091 *Pst* DC3000 and 0.2 % sucrose, and co-inoculated with *Pst* DC3000 and 1 %  
1092 sucrose. For **(a)** and **(b)**, the bacterial population was monitored by plating serial  
1093 dilutions of leaf extracts at 0, 1, 2, and 3 dpi. Significant differences ( $P < 0.05$ ) after  
1094 applying two-way ANOVA and Tukey's correction are indicated by different letters.  
1095 Data were obtained from the mean of six biological replicates and two technical  
1096 replicates. Error bars show the standard error of mean (SEM). The *in planta* bacterial  
1097 number was expressed as  $\log_{10}$  values. **c** Phenotypes of mutant and wild-type  
1098 plants inoculated with the nonhost pathogen *Psp* alone and co-inoculated with *Psp*  
1099 and 1 % sucrose. **d** Phenotypes of mutant and wild-type plants inoculated with the  
1100 host pathogen *Pst* DC3000 alone and co-inoculated with *Pst* DC3000 and 1 %  
1101 sucrose. For **(c)** and **(d)**, photographs were taken at 3 dpi. The experiment was  
1102 repeated twice, and consistent results were observed.

1103

1104 **Fig. 6 Accumulation of AtSWEET11 and AtSWEET12 transporters after**  
1105 **pathogen infection.**

1106 **a** and **b** The expression of AtSWEET11-GUS and AtSWEET12-GUS translational  
1107 fusion proteins in the leaf veins was studied by a  $\beta$ -glucuronidase assay. Leaves of  
1108 32-day-old *Arabidopsis* plants expressing stable translational fusion of **(a)**

1109 *AtSWEET11:AtSWEET11-GUS* and **(b)** *AtSWEET12:AtSWEET12-GUS* were  
1110 syringe-inoculated with sterile water (mock), *Pst* DC3000 at  $5 \times 10^5$  CFU/mL, and  
1111 *Psp* at  $1 \times 10^6$  CFU/mL. Samples were collected at 0, 36, and 48 hours post  
1112 inoculation (hpi). Photographs were taken at 1X magnification after GUS staining,  
1113 and the stained area was scored by ImageJ software (<http://imagej.nih.gov/ij/>). The  
1114 intensity values were calculated and presented at the bottom of the image. The  
1115 intensity was depicted as  $\log_{10}$  values obtained from the mean  $\pm$  SEM of three  
1116 biological replicates. The experiment was repeated thrice, and consistent results  
1117 were observed.

1118

1119

1120 **Fig. 7 Pathogen exposure triggers plasma membrane targeting of AtSWEET12**  
1121 **protein leading to plant defense**

1122 **a** The accumulation of AtSWEET12-YFP fusion proteins was analyzed by confocal  
1123 microscope after inoculation with sterile water (mock), *Psp* at  $1 \times 10^6$  CFU/mL and  
1124 *Pst* DC3000 at  $5 \times 10^5$  CFU/mL in the leaves of stable transgenic Arabidopsis plants  
1125 expressing *p35S:AtSWEET12-eYFP*. Samples were collected at 0 and 48 hours post  
1126 inoculation (hpi). The leaf samples were observed using a Leica TCS SP8 confocal  
1127 microscope (excitation at 514 nm, fluorescence YFP signal was recorded between  
1128 525 and 560 nm). The images were taken using a 63X objective and analyzed by  
1129 Leica microsystems LAS AF confocal software. The area highlighted by light blue  
1130 color in the images (middle) was shown in the form of magnified images on left and  
1131 right side respectively. Light blue color arrow indicates the localization of  
1132 AtSWEET12-YFP fusion proteins to the intracellular vesicles in the cytoplasm. The  
1133 bright field images were shown in Supplementary Fig. 16. The experiment was  
1134 repeated twice, and consistent results were observed. **b** and **c** The leaves of 32-day-  
1135 old Arabidopsis wild-type (Col-0) and AtSWEET12 overexpression transgenic plants  
1136 (expressing *p35S:AtSWEET12-eYFP*) were inoculated with **(b)** the nonhost  
1137 pathogen *Psp* at  $1 \times 10^6$  CFU/mL and **(c)** the host pathogen *Pst* DC3000 at  $5 \times 10^5$   
1138 CFU/mL. Bacterial multiplication assays were performed, and the bacterial  
1139 populations were monitored by plating serial dilutions of leaf extracts at 0-, 1-, 2-,  
1140 and 3-days post inoculation (dpi). *In planta* bacterial number was expressed as  $\log_{10}$   
1141 values. Data were obtained from the mean of six biological replicates and two  
1142 technical replicates. Error bars show the standard error of the mean (SEM). **d** The

1143 sucrose levels were measured in the apoplast obtained from 32-day-old Arabidopsis  
1144 wild-type (Col-0) and AtSWEET12 overexpression transgenic plants by a sugar  
1145 quantification kit. Data were obtained from the mean of five biological replicates (n =  
1146 5), and error bars show the SEM. **b**, **c** and **d** Significant differences ( $P < 0.05$ ) after  
1147 applying one-way ANOVA and Tukey's correction are indicated by different letters.  
1148 The experiment was repeated thrice, and consistent results were observed.

1149

1150 **Fig. 8 Coexpression of AtSWEET11 and AtSWEET12 transporters in yeast**  
1151 **inhibits the sucrose transport activity.**

1152 **a**, Growth of SUSY/URA3 (sucrose-deficient) yeast transformants expressing  
1153 *AtSWEET11* and/or *AtSWEET12* either in the vector pDR196 or p112A1NE, and  
1154 empty vector epDR196 or ep112A1NE on solid media containing 2% sucrose or 2%  
1155 glucose (control). Images were captured after incubation at 30 °C for 4 days. The  
1156 experiment was repeated at least three times **b-e**, Concentration-dependent (5mM,  
1157 25mM, 50mM, 100mM, 200mM, 300mM and 400mM) [ $^{14}$ C] sucrose uptake activity  
1158 was measured in SUSY/URA3 yeast cells coexpressing **(b)** *AtSWEET11* in vector  
1159 pDR196 or p112A1NE, **(c)** *AtSWEET12* in vector pDR196 or p112A1NE, **(d)**  
1160 *AtSWEET11* in vector pDR196 and *AtSWEET12* in vector p112A1NE, **(e)**  
1161 *AtSWEET11* in vector p112A1NE and *AtSWEET12* in vector pDR196. The  $V_{max}$ ,  $K_M$   
1162 and R-squared ( $r^2$ ) values are presented in the graph. The  $r^2$  value gives the  
1163 statistical measure of extent of variation between the two variable in a regression  
1164 model. Significant differences ( $P < 0.0001$ ) after applying Student's t-test, ( $P <$   
1165  $0.005$ ) after applying one-way ANOVA. Data were obtained from the mean  $\pm$   
1166 standard error (SE) of six replicates (n=6) (see Supplementary Dataset S1 for raw  
1167 data). The experiment was repeated twice, and consistent results were observed.

1168

1169 **Fig. 9 Model depicting the regulation of apoplastic sucrose levels by**  
1170 **AtSWEET12 transporter during plant defense.**

1171 **a** Under normal conditions, AtSWEET11 is actively involved in sucrose efflux into the  
1172 apoplast during the phloem loading process. **b** After bacterial infection, plant reduces  
1173 the expression of *AtSWEET11* gene and the abundance of the AtSWEET11  
1174 transporter at the plasma membrane. Meanwhile, the plant induces *AtSWEET12*  
1175 expression and increases the targeting of the AtSWEET12 transporter to the plasma  
1176 membrane. AtSWEET12 co-interacts and heterooligomerizes with AtSWEET11 that

1177 inhibits the transport of sucrose. We speculate that the oligomerization of  
1178 AtSWEET12 with AtSWEET11 might be one of the regulatory mechanisms through  
1179 which AtSWEET11-mediated sucrose efflux could be controlled by AtSWEET12,  
1180 thereby limiting sucrose availability to bacterial pathogens in the apoplast and,  
1181 thereby leading to the pathogen starvation. Moreover, we propose that plants  
1182 regulate the localization and abundance of the AtSWEET11 and AtSWEET12  
1183 transporters at the plasma membrane by constant endocytosis, recycling, and  
1184 protein degradation.

1185

## Parsed Citations

- Rico, A., and Preston, G.M. (2008). *Pseudomonas syringae* pv. tomato DC3000 uses constitutive and apoplast-induced nutrient assimilation pathways to catabolize nutrients that are abundant in the tomato apoplast. *Mol. Plant Mic. Int.* 21, 269-282.  
Google Scholar: [Author Only](#) [Title Only](#) [Author and Title](#)
- Fatima, U., and Senthil-Kumar, M. (2015). Plant and pathogen nutrient acquisition strategies. *Front. Plant Sci.* 6, 750.  
Google Scholar: [Author Only](#) [Title Only](#) [Author and Title](#)
- Wang, K., Senthil-Kumar, M., Ryu, C.M., Kang, L., Mysore, K.S. (2012). Phytosterols play a key role in plant innate immunity against bacterial pathogens by regulating nutrient efflux into the apoplast. *Plant Physiol.* 158, 1789-1802.  
Google Scholar: [Author Only](#) [Title Only](#) [Author and Title](#)
- Kocal, N., Sonnewald, U., and Sonnewald, S. (2008). Cell wall-bound invertase limits sucrose export and is involved in symptom development and inhibition of photosynthesis during compatible interaction between tomato and *Xanthomonas campestris* pv. *vesicatoria*. *Plant Physiol.* 148, 1523–1536.  
Google Scholar: [Author Only](#) [Title Only](#) [Author and Title](#)
- Sonnewald, S., Priller, J.P., Schuster, J., Glickmann, E., Hajirezaei, M.R., Siebig, S. (2012). Regulation of cell wall-bound invertase in pepper leaves by *Xanthomonas campestris* pv. *vesicatoria* type three effectors. *PLoS ONE* 7, e51763.  
Google Scholar: [Author Only](#) [Title Only](#) [Author and Title](#)
- Chen, L.Q., Qu, X.Q., Hou, B.H., Sosso, D., Osorio, S., Fernie, A.R., and Frommer, W.B. (2012). Sucrose efflux mediated by SWEET proteins as a key step for phloem transport. *Science* 335, 207–211.  
Google Scholar: [Author Only](#) [Title Only](#) [Author and Title](#)
- Chen, L.Q. (2014). SWEET sugar transporters for phloem transport and pathogen nutrition. *New Phytol.* 201, 1150–1155.  
Google Scholar: [Author Only](#) [Title Only](#) [Author and Title](#)
- Bezruczyk, M., Yang, J., Eom, J.S., Prior, M., Sosso, D., Hartwig, T., Szurek, B., Oliva, R., Vera-Cruz, C., White, F.F., Yang, B., and Frommer, W.B. (2018). Sugar flux and signaling in plant–microbe interactions. *Plant J.* 93, 675-685.  
Google Scholar: [Author Only](#) [Title Only](#) [Author and Title](#)
- Dixon, R.A., Achnine, L., Kota, P., Liu, C.J., Reddy, M.S.S., Wang, L.J. (2002). The phenylpropanoid pathway and plant defence: a genomics perspective. *Mol. Plant Pathol.* 3, 371–90.  
Google Scholar: [Author Only](#) [Title Only](#) [Author and Title](#)
- Ham, J.H., Kim, M.G., Lee, S.Y., Mackey, D. (2007). Layered basal defenses underlie non-host resistance of *Arabidopsis* to *Pseudomonas syringae* pv. *phaseolicola*. *Plant J.* 51, 604–16.  
Google Scholar: [Author Only](#) [Title Only](#) [Author and Title](#)
- Rojas, C.M., Senthil-Kumar, M., Wang, K., Ryu, C.M., Kaundal, A., Mysore, K.S. (2012). Glycolate oxidase plays a major role during nonhost resistance responses by modulating reactive oxygen species–mediated signal transduction pathways. *Plant Cell* 24, 336–52.  
Google Scholar: [Author Only](#) [Title Only](#) [Author and Title](#)
- Chen, L.Q., Hou B.H., Lalonde, S., Takanaga, H., Hartung, M.L., Qu, X. Q., et al. (2010). Sugar transporters for intercellular exchange and nutrition of pathogens. *Nature* 468, 527–532.  
Google Scholar: [Author Only](#) [Title Only](#) [Author and Title](#)
- Yamada, K., Saijo, Y., Nakagami, H., and Takano, Y. (2016). Regulation of sugar transporter activity for antibacterial defense in *Arabidopsis*. *Science* 354, 1427– 1430.  
Google Scholar: [Author Only](#) [Title Only](#) [Author and Title](#)
- Chong, J., Piron, M.C., Meyer, S., Merdinoglu, D., Bertsch, C., and Mestre, P. (2014). The SWEET family of sugar transporters in grapevine: VvSWEET4 is involved in the interaction with *Botrytis cinerea*. *J. Exp. Bot.* 65, 6589-6601.  
Google Scholar: [Author Only](#) [Title Only](#) [Author and Title](#)
- Chandran, D. (2015). Co-option of developmentally regulated plant SWEET transporters for pathogen nutrition and abiotic stress tolerance. *IUBMB Life* 67, 461–471.  
Google Scholar: [Author Only](#) [Title Only](#) [Author and Title](#)
- Chen, L.Q., Cheung, L.S., Feng, L., Tanner, W., and Frommer, W.B. (2015a). Transport of sugars. *Annu. Rev. Biochem.* 84, 865– 894.  
Google Scholar: [Author Only](#) [Title Only](#) [Author and Title](#)
- Chen, L.Q., Lin, I.W., Qu, X.Q., Sosso, D., McFarlane, H.E., Londoño, A., Samuels, A.L., and Frommer, W.B. (2015b). A cascade of sequentially expressed sucrose transporters in the seed coat and endosperm provides nutrition for the *Arabidopsis* embryo. *Plant Cell*, 27, 607– 619.  
Google Scholar: [Author Only](#) [Title Only](#) [Author and Title](#)
- Chen, H.Y., Huh, J.H., Yu, Y.C., Ho, L.H., Chen, L.Q., Tholl, D., Frommer, W.B., and Guo, W.J. (2015c). The *Arabidopsis* vacuolar sugar transporter SWEET2 limits carbon sequestration from roots and restricts *Pythium* infection. *Plant J.* 83, 1046– 1058.  
Google Scholar: [Author Only](#) [Title Only](#) [Author and Title](#)

Asai, Y., Kobayashi, Y., and Kobayashi, I. (2016). Increased expression of the tomato SISWEET15 gene during grey mold infection and the possible involvement of the sugar efflux to apoplast in the disease susceptibility. *J. Plant Pathol. Microbiol.* 7, 1-8.

Google Scholar: [Author Only](#) [Title Only](#) [Author and Title](#)

Antony, G., Zhou, J., Huang, S., Li, T., Liu, B., White, F., and Yang, B. (2010). Rice xa13 recessive resistance to bacterial blight is defeated by induction of the disease susceptibility gene Os-11N3. *Plant Cell* 22, 3864-3876.

Google Scholar: [Author Only](#) [Title Only](#) [Author and Title](#)

Gao, Y., Zhang, C., Han, X., Wang, Z.Y., Ma, L., Yuan, D.P., Wu, J.N., Zhu, X.F., Liu, J.M., Li, D.P., Hu, Y.B., and Xuan, Y.H. (2018). Inhibition of OsSWEET11 function in mesophyll cells improves resistance of rice to sheath blight disease. *Mol. Plant Pathol.* 19, 2149-2161.

Google Scholar: [Author Only](#) [Title Only](#) [Author and Title](#)

Heath, M.C. (2000). Nonhost resistance and nonspecific plant defenses. *Curr. Opin. Plant Biol.* 3, 315-319.

Google Scholar: [Author Only](#) [Title Only](#) [Author and Title](#)

Schulze-Lefert, P., and Panstruga, R. (2011). A molecular evolutionary concept connecting nonhost resistance, pathogen host range, and pathogen speciation. *Trends Plant Sci.* 16, 117-125.

Google Scholar: [Author Only](#) [Title Only](#) [Author and Title](#)

Senthil-Kumar, M., and Mysore, K.S. (2013). Nonhost resistance against bacterial pathogens: retrospectives and prospects. *Annu. Rev. Phytopathol.* 51, 407-427.

Google Scholar: [Author Only](#) [Title Only](#) [Author and Title](#)

Pini, F., East, A. K., Appia-Ayme, C., Tomek, J., Karunakaran, R., Mendoza-Suárez, M., and Poole, P. S. (2017). Bacterial biosensors for in vivo spatiotemporal mapping of root secretion. *Plant Physiol.* 174(3), 1289-1306.

Google Scholar: [Author Only](#) [Title Only](#) [Author and Title](#)

Li, J., Wu, L., Foster, R., and Ruan, Y. L. (2017). Molecular regulation of sucrose catabolism and sugar transport for development, defence and phloem function. *J Int Plant Biol.* 59(5), 322-335.

Google Scholar: [Author Only](#) [Title Only](#) [Author and Title](#)

Eom, J.S., Chen, L.Q., Sosso, D., Julius, B.T., Lin, I.W., Qu, X.Q., et al. (2015). SWEETs, transporters for intracellular and intercellular sugar translocation. *Curr. Opin. Plant Biol.* 25, 53-62.

Google Scholar: [Author Only](#) [Title Only](#) [Author and Title](#)

Zhou, J., Peng, Z., Long, J., Sosso, D., Liu, B., Eom, J. S., et al. (2015). Gene targeting by the TAL effector PthXo2 reveals cryptic resistance gene for bacterial blight of rice. *Plant J.* 82, 632-643.

Google Scholar: [Author Only](#) [Title Only](#) [Author and Title](#)

Wei, X., Nguyen, S. T., Collings, D. A., and McCurdy, D. W. (2020). Sucrose regulates wall ingrowth deposition in phloem parenchyma transfer cells in *Arabidopsis* via affecting phloem loading activity. *J Exp Botany*, 71(16), 4690-4702.

Google Scholar: [Author Only](#) [Title Only](#) [Author and Title](#)

Gebauer, P., Korn, M., Engelsdorf, T., Sonnewald, U., Koch, C. and Voll, L.M. (2017). Sugar accumulation in leaves of *Arabidopsis* sweet11/sweet12 double mutants enhances priming of the salicylic acid-mediated defense response. *Front. Plant Sci.* 8, 1378.

Google Scholar: [Author Only](#) [Title Only](#) [Author and Title](#)

Walerowski, P., Gündel, A., Yahaya, N., Truman, W., Sobczak, M., Olszak, M., Rolfe, S., Borisjuk, L. and Malinowski, R. (2018). Clubroot disease stimulates early steps of phloem differentiation and recruits SWEET sucrose transporters within developing galls. *Plant Cell* 30, 3058-3073.

Google Scholar: [Author Only](#) [Title Only](#) [Author and Title](#)

Eulgem, T., (2005). Regulation of the *Arabidopsis* defense transcriptome. *Trends Plant Sci.* 10, 71-78.

Google Scholar: [Author Only](#) [Title Only](#) [Author and Title](#)

Glazebrook, J. (2005). Contrasting mechanisms of defense against biotrophic and necrotrophic pathogens. *Annu. Rev. Phytopathol.* 43, 205-227.

Google Scholar: [Author Only](#) [Title Only](#) [Author and Title](#)

Xuan, Y.H., Hu, Y.B., Chen, L.Q., Sosso, D., Ducat, D.C., Hou, B.H. and Frommer, W.B., (2013). Functional role of oligomerization for bacterial and plant SWEET sugar transporter family. *Proc. Natl. Acad. Sci. USA* 110, E3685-E3694.

Google Scholar: [Author Only](#) [Title Only](#) [Author and Title](#)

Alguel, Y., Cameron, A.D., Diallinas, G., and Byrne, B. (2016). Transporter oligomerization: form and function. *Biochem. Soc. Trans.*, 44, 1737-1744.

Google Scholar: [Author Only](#) [Title Only](#) [Author and Title](#)

Reinders, A., Schulze, W., Kühn, C., Barker, L., Schulz, A., Ward, J. M., and Frommer, W. B. (2002). Protein-protein interactions between sucrose transporters of different affinities colocalized in the same enucleate sieve element. *Plant Cell*, 14(7), 1567-1577.

Google Scholar: [Author Only](#) [Title Only](#) [Author and Title](#)

Liu, K.H., and Tsay, Y.F., (2003). Switching between the two action modes of the dual-affinity nitrate transporter CHL1 by phosphorylation. *The EMBO J.* 22, 1005-1013.



Google Scholar: [Author Only](#) [Title Only](#) [Author and Title](#)

**Xu, Q., Yin, S., Ma, Y., Song, M., Song, Y., Mu, S., Chen, S. et al., (2020). Carbon export from leaves is controlled via ubiquitination and phosphorylation of sucrose transporter SUC2. Proc. Natl. Acad. Sci. USA, 117(11), 6223-6230.**

Google Scholar: [Author Only](#) [Title Only](#) [Author and Title](#)

**Wang, K., Kang, L., Anand, A., Lazarovits, G., & Mysore, K. S. (2007). Monitoring in planta bacterial infection at both cellular and whole-plant levels using the green fluorescent protein variant GFPuv. New Phytologist, 174(1), 212-223.**

Google Scholar: [Author Only](#) [Title Only](#) [Author and Title](#)

**Jefferson, R.A., Kavanagh, T.A., and Bevan, M.W. (1987). GUS fusions: beta-glucuronidase as a sensitive and versatile gene fusion marker in higher plants. EMBO J. 6, 3901-3907.**

Google Scholar: [Author Only](#) [Title Only](#) [Author and Title](#)

**O'Leary, B.M., Rico, A., McCraw, S., Fones, H.N., and Preston, G.M., (2014). The infiltration-centrifugation technique for extraction of apoplastic fluid from plant leaves using Phaseolus vulgaris as an example. JoVE (Journal of Visualized Experiments), 94, e52113.**

Google Scholar: [Author Only](#) [Title Only](#) [Author and Title](#)

**Lisec, J., Schauer, N., Kopka, J., Willmitzer, L., and Fernie, A.R. (2006). Gas chromatography mass spectrometry-based metabolite profiling in plants. Nat. Protoc. 1, 387.**

Google Scholar: [Author Only](#) [Title Only](#) [Author and Title](#)

**Untergasser, A., Cutcutache, I., Koressaar, T., Ye, J., Faircloth, B.C., Remm, M. and Rozen, S.G. (2012). Primer3-new capabilities and interfaces. Nucleic Acids Res. 40, e115-e115.**

Google Scholar: [Author Only](#) [Title Only](#) [Author and Title](#)

**Livak, K.J., and Schmittgen, T.D. (2001). Analysis of relative gene expression data using real-time quantitative PCR and the 2- $\Delta\Delta CT$  method. Methods. 25, 402-408.**

Google Scholar: [Author Only](#) [Title Only](#) [Author and Title](#)

**Riesmeier, J.W., Willmitzer, L., and Frommer, W.B. (1992). Isolation and characterization of a sucrose carrier cDNA from spinach by functional expression in yeast. EMBO J. 11, 4705-4713.**

Google Scholar: [Author Only](#) [Title Only](#) [Author and Title](#)

**Sauer, N., and Stadler, R. (1993). A sink-specific H<sup>+</sup>/monosaccharide co-transporter from Nicotiana tabacum: Cloning and heterologous expression in baker's yeast. Plant J. 4, 601-610.**

Google Scholar: [Author Only](#) [Title Only](#) [Author and Title](#)

**Ho, L. H., Klemens, P. A., Neuhaus, H. E., Ko, H. Y., Hsieh, S. Y., and Guo, W. J. (2019). SISWEET1a is involved in glucose import to young leaves in tomato plants. J. Exp. Bot. 70(12), 3241-3254.**

Google Scholar: [Author Only](#) [Title Only](#) [Author and Title](#)

## **ADDITIONAL INFORMATION**
